# Supplementary material for: Palliative radiotherapy after oesophageal cancer stenting (ROCS): a multicentre, open-label, phase 3 randomised controlled trial
Source: PubMed Central journal article supplement (PMC7955283; doi:10.1016/s2468-1253(21)00004-2), 2021-02-19
Supplement: mmc1.pdf [file mmc1.pdf]

# THE LANCET

## Gastroenterology & Hepatology

### Supplementary appendix

This appendix formed part of the original submission and has been peer reviewed.  
We post it as supplied by the authors.

Supplement to: Adamson D, Byrne A, Porter C, et al. Palliative radiotherapy after oesophageal cancer stenting (ROCS): a multicentre, open-label, phase 3 randomised controlled trial. *Lancet Gastroenterol Hepatol* 2021; published online Feb 18.  
[https://doi.org/10.1016/S2468-1253\(21\)00004-2](https://doi.org/10.1016/S2468-1253(21)00004-2).

## **Appendix**

**Supplementary data for Palliative radiotherapy after oesophageal cancer stenting (ROCS):  
a multicentre, open-label, phase 3 randomised controlled trial**

## Supplementary tables

**Table S1: Summary of changes to original ROCS protocol approved by Research Ethics Committee**

| Change to protocol                                                                                                                                                                                                                                                                                                                                                                                                                                                                                                                                                                                                                                         | Date           |
|------------------------------------------------------------------------------------------------------------------------------------------------------------------------------------------------------------------------------------------------------------------------------------------------------------------------------------------------------------------------------------------------------------------------------------------------------------------------------------------------------------------------------------------------------------------------------------------------------------------------------------------------------------|----------------|
| Exclusion criterion removed: Planned endoscopic treatment of the tumour (e.g. laser) in the immediate peri-stenting period                                                                                                                                                                                                                                                                                                                                                                                                                                                                                                                                 | April 2013     |
| Inclusion criterion added: Patient has completed baseline Quality of Life Questionnaires added in the inclusion criteria                                                                                                                                                                                                                                                                                                                                                                                                                                                                                                                                   | April 2013     |
| Companion patient information sheet and consent form introduced in the qualitative study                                                                                                                                                                                                                                                                                                                                                                                                                                                                                                                                                                   | September 2014 |
| Dedicated face to face follow up specified as preferred to ensure optimum support for patients; telephone or postal follow up for questionnaire completion also permitted depending on patient's choice.                                                                                                                                                                                                                                                                                                                                                                                                                                                   | September 2014 |
| Additional level of withdrawal added – option for participants to stop home visits and questionnaires but follow up                                                                                                                                                                                                                                                                                                                                                                                                                                                                                                                                        | September 2014 |
| Qualitative study added Interviews with research nurses responsible for recruiting patients to the trial.                                                                                                                                                                                                                                                                                                                                                                                                                                                                                                                                                  | September 2014 |
| Randomisation allowed within two weeks after stent insertion, but preferably within one week of stent insertion                                                                                                                                                                                                                                                                                                                                                                                                                                                                                                                                            | April 2015     |
| Baseline assessments for those patients consented following stent insertion, ideally baseline assessments will occur within one week, but not more than two weeks, following the procedure.                                                                                                                                                                                                                                                                                                                                                                                                                                                                | April 2015     |
| Clarification of time zero due to consent also possible after stent.                                                                                                                                                                                                                                                                                                                                                                                                                                                                                                                                                                                       | April 2015     |
| Secondary outcome added: Determine the haemostatic effect of radiotherapy on tumour bleeding                                                                                                                                                                                                                                                                                                                                                                                                                                                                                                                                                               | March 2016     |
| Inclusion criterion of oesophageal carcinoma widened to include clinical and/or radiological evidence of invasive tumour (as agreed by MDT consensus) and at least high grade dysplasia of a non-small cell type on histology                                                                                                                                                                                                                                                                                                                                                                                                                              | March 2016     |
| Interim phone calls introduced two weeks after stent insertion and four-weekly thereafter to be scheduled half-way between the 4 weekly assessment visits.                                                                                                                                                                                                                                                                                                                                                                                                                                                                                                 | March 2016     |
| Dysphagia card was introduced with a list of questions asked during the phone calls.                                                                                                                                                                                                                                                                                                                                                                                                                                                                                                                                                                       | March 2016     |
| Follow up until death reduced to 1 year, follow up post 1 year is Death CRF only                                                                                                                                                                                                                                                                                                                                                                                                                                                                                                                                                                           | March 2016     |
| Primary outcome amended:<br>Assess the impact of radiotherapy in addition to stent placement on time to progression of patient-reported dysphagia or other dysphagia-related event in a patient population unable to undergo surgery.                                                                                                                                                                                                                                                                                                                                                                                                                      | February 2017  |
| Final accrual reduced from original 496 to 220.                                                                                                                                                                                                                                                                                                                                                                                                                                                                                                                                                                                                            | December 2017  |
| Primary outcome amended:<br>To assess the impact of radiotherapy in addition to stent placement on difference in event rate of patient-reported dysphagia or other dysphagia-related event at 12 weeks following stent insertion in a patient population unable to undergo surgery. Originally it was intended to perform a time to event analysis. However, in collaboration with the IDMC in response to recruitment difficulties, the primary outcome analysis has been amended and will now be based on proportion of events at week 12. An event is defined as a progression in self-reported dysphagia (see above) or other dysphagia-related event. | December 2017  |
| Follow up for 1 year or up to 3 months after the last patient is recruited whichever comes first                                                                                                                                                                                                                                                                                                                                                                                                                                                                                                                                                           | December 2017  |
| New secondary outcome - Measure hospital admission rates                                                                                                                                                                                                                                                                                                                                                                                                                                                                                                                                                                                                   | December 2017  |

**Table S2: Stent insertion by trial arm**

|                                                                | UC*                  | EBRT*               |
|----------------------------------------------------------------|----------------------|---------------------|
|                                                                | N=102                | N=97                |
| <b>Type of stent</b>                                           |                      |                     |
| Fully covered stent                                            | 31 (30.4)            | 24 (24.7)           |
| Covered stent with anti-reflux valve                           | 5 (4.9)              | 3 (3.1)             |
| Partially covered stent                                        | 55 (53.9)            | 58 (59.8)           |
| Partially covered stent with anti-reflux valve                 | 0 (0.0)              | 1 (1.0)             |
| Uncovered                                                      | 9 (8.8)              | 9 (9.3)             |
| Missing                                                        | 2 (2.0)              | 2 (2.1)             |
| <b>Length of stent - median (IQR), n</b>                       |                      |                     |
|                                                                | 10.2 (8.0-13.0), 100 | 10.3 (8.0-13.0), 92 |
| <b>Dilation required</b>                                       |                      |                     |
| Before stent insertion                                         | 4 (3.9)              | 10 (10.3)           |
| After stent insertion                                          | 0 (0.0)              | 2 (2.1)             |
| Not required                                                   | 95 (93.1)            | 80 (82.5)           |
| Missing                                                        | 3 (2.9)              | 5 (5.2)             |
| <b>Radiological imaging used</b>                               |                      |                     |
| Yes                                                            | 69 (67.6)            | 46 (47.4)           |
| No                                                             | 33 (32.4)            | 48 (49.5)           |
| Missing                                                        | 0 (0.0)              | 3 (3.1)             |
| <b>Post insertion oesophagogram performed</b>                  |                      |                     |
| Yes                                                            | 10 (9.8)             | 13 (13.4)           |
| No                                                             | 92 (90.2)            | 84 (86.6)           |
| <i>If yes, any stent slippage - N(%)</i>                       |                      |                     |
| Yes                                                            | 0 (0.0)              | 3 (23.1)            |
| No                                                             | 10 (100.0)           | 10 (76.9)           |
| <b>Number of nights in hospital post stent-median (IQR), n</b> |                      |                     |
|                                                                | 1.0 (0.0-2.0), 102   | 1.0 (0.0-2.0), 95   |
| <b>Acute airway compression</b>                                |                      |                     |
| Yes                                                            | 0 (0.0)              | 0 (0.0)             |
| No                                                             | 99 (97.1)            | 96 (99.0)           |
| Missing                                                        | 3 (2.9)              | 1 (1.0)             |
| <b>Oesophageal or other GI tract perforation</b>               |                      |                     |
| Yes                                                            | 0 (0.0)              | 0 (0.0)             |
| No                                                             | 101 (99.0)           | 97 (100.0)          |
| Missing                                                        | 1 (1.0)              | 0 (0.0)             |
| <b>CT scan performed post stent insertion</b>                  |                      |                     |
| Yes                                                            | 3 (2.9)              | 7 (7.2)             |
| No                                                             | 99 (97.1)            | 90 (92.8)           |
| <b>Chest X-ray performed post stent insertion</b>              |                      |                     |
| Yes                                                            | 23 (22.5)            | 21 (21.6)           |
| No                                                             | 79 (77.5)            | 76 (78.4)           |

\*n (%) unless otherwise indicated

**Table S3: Compliance with radiotherapy in stent plus radiotherapy arm**

|                                                                                            |  | <b>EBRT (N=97)*</b>        |
|--------------------------------------------------------------------------------------------|--|----------------------------|
| <b>Number of patients receiving radiotherapy</b>                                           |  | 82 (84.5)                  |
| <b>Number of days from stent insertion to start of radiotherapy-median (IQR; range), n</b> |  | 20 (16-25; 6-61)           |
| <b>Reasons if radiotherapy not received</b>                                                |  |                            |
| Withdrew before radiotherapy                                                               |  | 7 (7.2)                    |
| Died before radiotherapy                                                                   |  | 8 (8.2)                    |
| <b>Planned dose</b>                                                                        |  |                            |
| Planned dose 20Gy in 5 fractions                                                           |  | 64 (78.0)                  |
| Planned dose 30Gy in 10 fractions                                                          |  | 17 (20.7)                  |
| Planned dose 8Gy in 1 fractions                                                            |  | 1 (1.2)                    |
| Reduction to planned dose                                                                  |  | 1 (1.2)                    |
| <b>Radiotherapy delays</b>                                                                 |  |                            |
| Number of delays                                                                           |  | 10 (12.2)                  |
| <b>Reasons for delay</b>                                                                   |  |                            |
| Toxicity                                                                                   |  | 1 (10.0)                   |
| Patient choice                                                                             |  | 1 (10.0)                   |
| Logistical/machine breakdown                                                               |  | 3 (30.0)                   |
| Been hospitalised hydration                                                                |  | 1 (10.0)                   |
| Felt ill                                                                                   |  | 1 (10.0)                   |
| Weekend break                                                                              |  | 1 (10.0)                   |
| Bank holidays                                                                              |  | 1 (10.0)                   |
| Not known                                                                                  |  | 1 (10.0)                   |
| <b>Number of days delayed-median (IQR; range), n</b>                                       |  | 2.0 (1.0-2.0; 1.0-5.0), 10 |
| <b>Field size (cm)-median (IQR), n</b>                                                     |  |                            |
| X                                                                                          |  | 12.0 (10.0-14.0), 81       |
| Y                                                                                          |  | 11.4 (8.3-14.0), 81        |
| <b>Field Definition</b>                                                                    |  |                            |
| CT Simulator                                                                               |  | 77 (93.9)                  |
| Conventional simulator                                                                     |  | 5 (6.1)                    |
| <b>Field Arrangement</b>                                                                   |  |                            |
| Parallel pair (AP-PA)                                                                      |  | 76 (92.7)                  |
| 3D Conformal Radiotherapy                                                                  |  | 2 (40.0)                   |
| 4 - field                                                                                  |  | 1 (20.0)                   |
| 5 - field                                                                                  |  | 1 (20.0)                   |
| Conformal "4" field box                                                                    |  | 1 (20.0)                   |
| Missing                                                                                    |  | 1 (1.2)                    |
| <b>Number of beams - median (IQR)</b>                                                      |  | 2.0 (2.0-2.0), 82          |
| <b>Beam 1</b>                                                                              |  |                            |
| 6                                                                                          |  | 56 (68.3)                  |
| 10                                                                                         |  | 25 (30.5)                  |
| Missing                                                                                    |  | 1 (1.2)                    |
| <b>Beam 2</b>                                                                              |  |                            |
| 6                                                                                          |  | 56 (68.3)                  |
| 10                                                                                         |  | 25 (30.5)                  |
| Missing                                                                                    |  | 1 (1.2)                    |
| <b>Beam 3</b>                                                                              |  |                            |
| 6                                                                                          |  | 5 (6.1)                    |
| 10                                                                                         |  | 1 (1.2)                    |
| Missing                                                                                    |  | 76 (92.7)                  |

|                                                  |           |
|--------------------------------------------------|-----------|
| <b>Beam 4</b>                                    |           |
| 6                                                | 5 (6.1)   |
| 10                                               | 1 (1.2)   |
| Missing                                          | 76 (92.7) |
| <b>Contrast applied</b>                          |           |
| Yes                                              | 17 (20.7) |
| No                                               | 65 (79.3) |
| <b>Dose calculation method used</b>              |           |
| Tables                                           | 43 (52.4) |
| TPS                                              | 37 (45.1) |
| 1st calculation check done in RADCALC (Computer) | 1 (50.0)  |
| OMP Planning System                              | 1 (50.0)  |
| <b>Inhomogeneity correction used</b>             |           |
| Yes                                              | 18 (22.0) |
| No                                               | 64 (78.0) |

\*n (%) unless otherwise indicated

**Table S4: Baseline characteristics of participants missing vs not missing primary endpoint data**

|                                                                  | Complete data up to week 12* | Missing data up to week 12* |
|------------------------------------------------------------------|------------------------------|-----------------------------|
|                                                                  | N=149                        | N=50                        |
| <b>Randomisation time point</b>                                  |                              |                             |
| Before stent                                                     | 59 (39.6)                    | 16 (32.0)                   |
| After stent                                                      | 90 (60.4)                    | 34 (68.0)                   |
| <b>Age - median (IQR), n</b>                                     | 72.2 (64.8-80.2), 149        | 75.0 (68.4-83.3), 50        |
| <b>WHO performance status</b>                                    |                              |                             |
| 0                                                                | 17 (11.4)                    | 3 (6.0)                     |
| 1                                                                | 93 (62.4)                    | 27 (54.0)                   |
| 2                                                                | 37 (24.8)                    | 17 (34.0)                   |
| 3                                                                | 2 (1.3)                      | 3 (6.0)                     |
| <b>Tumour type</b>                                               |                              |                             |
| Adenocarcinoma                                                   | 96 (64.4)                    | 33 (66.0)                   |
| Squamous                                                         | 51 (34.2)                    | 16 (32.0)                   |
| Undifferentiated/other                                           | 2 (1.3)                      | 1 (2.0)                     |
| <b>Overall length of primary tumour (endoscopic assessment)</b>  |                              |                             |
| Measured length (cm) - median (IQR), n                           | 5.0 (4.0-7.0), 93            | 5.3 (4.3-7.0), 28           |
| Estimated length (cm) - median (IQR), n                          | 6.0 (5.0-8.0), 42            | 7.0 (5.5-9.0), 19           |
| Measured/estimated length (cm) - median (IQR), n                 | 6.0 (4.0-8.0), 135           | 6.0 (5.0-8.0), 47           |
| Missing                                                          | 14 (9.4)                     | 3 (6.0)                     |
| <b>Alternative method for assessing length</b>                   |                              |                             |
| PET                                                              | 9 (6.0)                      | 3 (6.0)                     |
| CT                                                               | 33 (22.1)                    | 13 (26.0)                   |
| Barium                                                           | 0 (0.0)                      | 0 (0.0)                     |
| Other                                                            | 1 (0.7)                      | 0 (0.0)                     |
| None                                                             | 1 (0.7)                      | 0 (0.0)                     |
| <b>Site of predominant tumour</b>                                |                              |                             |
| Upper                                                            | 5 (3.4)                      | 1 (2.0)                     |
| Middle                                                           | 34 (22.8)                    | 15 (30.0)                   |
| Lower                                                            | 109 (73.2)                   | 34 (68.0)                   |
| <i>If lower, involvement of oesophago-gastric junction (GOJ)</i> | 60 (40.3)                    | 16 (32.0)                   |
| Unknown                                                          | 1 (0.7)                      | 0 (0.0)                     |
| <b>Extension across GOJ (if involvement of GOJ)</b>              |                              |                             |
| Siewart type 1                                                   | 32 (21.5)                    | 9 (18.0)                    |
| Siewart type 2                                                   | 26 (17.4)                    | 2 (4.0)                     |
| Missing                                                          | 2 (1.3)                      | 5 (10.0)                    |
| <b>T stage</b>                                                   |                              |                             |
| 0                                                                | 1 (0.7)                      | 0 (0.0)                     |
| 1                                                                | 1 (0.7)                      | 1 (2.0)                     |
| 2                                                                | 7 (4.7)                      | 4 (8.0)                     |
| 3                                                                | 87 (58.4)                    | 28 (56.0)                   |
| 4                                                                | 45 (30.2)                    | 15 (30.0)                   |
| Unknown                                                          | 2 (1.3)                      | 2 (4.0)                     |
| X                                                                | 6 (4.0)                      | 0 (0.0)                     |
| <b>N stage</b>                                                   |                              |                             |
| 0                                                                | 20 (13.4)                    | 7 (14.0)                    |
| 1                                                                | 68 (45.6)                    | 24 (48.0)                   |
| 2                                                                | 29 (19.5)                    | 11 (22.0)                   |
| 3                                                                | 27 (18.1)                    | 5 (10.0)                    |
| Unknown                                                          | 1 (0.7)                      | 2 (4.0)                     |
| X                                                                | 4 (2.7)                      | 1 (2.0)                     |

|                      | Complete data up to week 12* | Missing data up to week 12* |
|----------------------|------------------------------|-----------------------------|
|                      | N=149                        | N=50                        |
| <b>M stage</b>       |                              |                             |
| 0                    | 63 (42.3)                    | 24 (48.0)                   |
| 1                    | 77 (51.7)                    | 22 (44.0)                   |
| Unknown              | 1 (0.7)                      | 2 (4.0)                     |
| X                    | 8 (5.4)                      | 2 (4.0)                     |
| <b>Overall stage</b> |                              |                             |
| 1-3                  | 70 (47.0)                    | 27 (54.0)                   |
| 4                    | 79 (53.0)                    | 23 (46.0)                   |

\*n (%) unless otherwise indicated



**Table S5: Analysis of status and primary endpoint at 12 weeks post stent insertion in the PP population by trial arm**

|                                                    | UC*       | EBRT*     | Adjusted OR** (95%CI; p-value, n) |
|----------------------------------------------------|-----------|-----------|-----------------------------------|
|                                                    | N=90      | N=82      |                                   |
| <b>Incomplete case data at week 12</b>             |           |           |                                   |
| Completely withdrew with no event                  | 2 (2.2)   | 3 (3.7)   |                                   |
| Died with incomplete data and no event             | 8 (8.9)   | 5 (6.1)   |                                   |
| Alive at week 12 with incomplete data and no event | 14 (15.6) | 10 (12.2) |                                   |
| <b>Reasons for complete withdrawal</b>             |           |           |                                   |
| Participant choice                                 | 1 (1.1)   | 2 (2.4)   |                                   |
| Informed by CNS on family's behalf                 | 1 (1.1)   | 0 (0.0)   |                                   |
| Loss to follow up                                  | 0 (0.0)   | 1 (1.2)   |                                   |
| <b>Complete case data at week 12</b>               |           |           |                                   |
| Total with complete data                           | 66 (73.3) | 64 (78.0) |                                   |
| Died with complete data                            | 12 (13.3) | 14 (17.1) |                                   |
| <i>Alive at week 12 with complete data</i>         | 54 (60.0) | 50 (61.0) |                                   |
| <b>Complete case analysis (death as an event)</b>  |           |           |                                   |
| Number of primary events or deaths                 | 28 (42.4) | 26 (40.6) | 0.99 (0.45-2.14; 0.972; 130)      |
| <b>Complete case analysis (death as non-event)</b> |           |           |                                   |
| Number of primary events                           | 19 (28.8) | 19 (29.7) | 1.20 (0.53-2.71; 0.666; 130)      |
| <b>Best case</b>                                   |           |           |                                   |
| Total with complete data                           | 82 (91.1) | 76 (92.7) |                                   |
| Number of primary events or deaths                 | 32 (39.0) | 28 (36.8) | 0.96 (0.48-1.93; 0.910; 158)      |
| <b>Worst case</b>                                  |           |           |                                   |
| Total with complete data                           | 82 (91.1) | 76 (92.7) |                                   |
| Number of primary events or deaths                 | 45 (54.9) | 37 (48.7) | 0.80 (0.41-1.58; 0.527; 158)      |

\* n(%) unless otherwise indicated

\*\* Adjusted for randomisation stratification factors

**Table S6: Cause of death by trial arm**

|                                                 | <b>UC*</b> | <b>EBRT*</b> |
|-------------------------------------------------|------------|--------------|
|                                                 | N=102      | N=97         |
| Total deaths                                    | 86 (84.3)  | 82 (84.5)    |
| Oesophageal cancer                              | 79 (91.9)  | 72 (87.8)    |
| Stent related                                   | 2 (2.3)    | 2 (2.4)      |
| Mediastinitis from suspected tumour perforation | 0 (0.0)    | 1 (1.2)      |
| Acute kidney injury, Bladder cancer             | 0 (0.0)    | 1 (1.2)      |
| Cardiovascular                                  | 1 (1.2)    | 1 (1.2)      |
| Chest sepsis                                    | 2 (2.3)    | 1 (1.2)      |
| GI bleed                                        | 0 (0.0)    | 1 (1.2)      |
| Neutropenic Sepsis                              | 0 (0.0)    | 1 (1.2)      |
| Pulmonary embolism                              | 0 (0.0)    | 2 (2.4)      |
| Unknown                                         | 2 (2.3)    | 0 (0.0)      |

\*n (%) unless otherwise indicated.

Of the 3 deaths reported through the SAE system, the “fall” was eventually categorised as hospital-acquired pneumonia (after being admitted due to a fall) so is included here under ‘chest sepsis’, the “myocardial infarction” is included here under ‘cardiovascular’, and the “multifocal ischaemic stroke” is included under ‘oesophageal cancer’ as death was felt to be due to progressive oesophageal cancer with ischemic stroke as contributory factor.

**Table S7: EORTC QLQ-C30 questionnaire return and missing reason by trial arm**

| Weeks post stent insertion | UC*                                     |              |                         |                                              |                                     | EBRT*                                   |              |                         |                                              |                                     |
|----------------------------|-----------------------------------------|--------------|-------------------------|----------------------------------------------|-------------------------------------|-----------------------------------------|--------------|-------------------------|----------------------------------------------|-------------------------------------|
|                            | N=102                                   |              |                         |                                              |                                     | N=97                                    |              |                         |                                              |                                     |
|                            | Withdrawn/died before form expected (n) | Expected (n) | Actually received (n;%) | Help needed to complete questionnaire (n; %) | Carer completed questionnaire (n;%) | Withdrawn/died before form expected (n) | Expected (n) | Actually received (n;%) | Help needed to complete questionnaire (n; %) | Carer completed questionnaire (n;%) |
| 1                          | 0                                       | 102          | 101 (99.0)              | 46 (45.5)                                    | 5 (5.0)                             | 0                                       | 97           | 96 (99.0)               | 38 (39.6)                                    | 7 (7.3)                             |
| 4                          | 11                                      | 91           | 77 (84.6)               | 36 (46.8)                                    | 3 (3.9)                             | 6                                       | 91           | 73 (80.2)               | 28 (38.4)                                    | 3 (4.1)                             |
| 8                          | 23                                      | 79           | 60 (75.9)               | 32 (53.3)                                    | 2 (3.3)                             | 17                                      | 80           | 57 (71.3)               | 27 (47.4)                                    | 4 (7.0)                             |
| 12                         | 37                                      | 65           | 42 (64.6)               | 18 (42.9)                                    | 0 (0.0)                             | 34                                      | 63           | 47 (74.6)               | 21 (44.7)                                    | 3 (6.4)                             |
| 16                         | 49                                      | 53           | 36 (67.9)               | 24 (66.7)                                    | 1 (2.8)                             | 45                                      | 52           | 37 (71.2)               | 20 (54.1)                                    | 3 (8.1)                             |
| 20                         | 57                                      | 45           | 28 (62.2)               | 19 (67.9)                                    | 0 (0.0)                             | 55                                      | 42           | 31 (73.8)               | 15 (48.4)                                    | 2 (6.5)                             |
| 24                         | 58                                      | 44           | 24 (54.5)               | 14 (58.3)                                    | 1 (4.2)                             | 58                                      | 39           | 25 (64.1)               | 11 (44.0)                                    | 1 (4.0)                             |
| 28                         | 65                                      | 37           | 20 (54.1)               | 11 (55.0)                                    | 1 (5.0)                             | 70                                      | 27           | 16 (59.3)               | 10 (62.5)                                    | 1 (6.3)                             |
| 32                         | 72                                      | 30           | 11 (36.7)               | 9 (81.8)                                     | 0 (0.0)                             | 76                                      | 21           | 10 (47.6)               | 6 (60.0)                                     | 2 (20.0)                            |
| 36                         | 76                                      | 26           | 11 (42.3)               | 7 (63.6)                                     | 0 (0.0)                             | 81                                      | 16           | 9 (56.3)                | 7 (77.8)                                     | 1 (11.1)                            |
| 40                         | 79                                      | 23           | 12 (52.2)               | 5 (41.7)                                     | 0 (0.0)                             | 82                                      | 15           | 8 (53.3)                | 5 (62.5)                                     | 1 (12.5)                            |
| 44                         | 85                                      | 17           | 6 (35.3)                | 3 (50.0)                                     | 0 (0.0)                             | 83                                      | 14           | 6 (42.9)                | 4 (66.7)                                     | 1 (16.7)                            |
| 48                         | 84                                      | 18           | 6 (33.3)                | 4 (66.7)                                     | 0 (0.0)                             | 84                                      | 13           | 4 (30.8)                | 3 (75.0)                                     | 0 (0.0)                             |
| 52                         | 86                                      | 16           | 3 (18.8)                | 2 (66.7)                                     | 0 (0.0)                             | 85                                      | 12           | 5 (41.7)                | 2 (40.0)                                     | 0 (0.0)                             |

\*n (%) unless otherwise indicated

**Table S8: EORTC QLQ-OG25 questionnaire return and missing reason by trial arm**

| Weeks post stent insertion | UC*                                     |              |                         |                                              |                                     | EBRT*                                   |              |                         |                                              |                                     |
|----------------------------|-----------------------------------------|--------------|-------------------------|----------------------------------------------|-------------------------------------|-----------------------------------------|--------------|-------------------------|----------------------------------------------|-------------------------------------|
|                            | N=102                                   |              |                         |                                              |                                     | N=97                                    |              |                         |                                              |                                     |
|                            | Withdrawn/died before form expected (n) | Expected (n) | Actually received (n;%) | Help needed to complete questionnaire (n, %) | Carer completed questionnaire (n;%) | Withdrawn/died before form expected (n) | Expected (n) | Actually received (n;%) | Help needed to complete questionnaire (n, %) | Carer completed questionnaire (n;%) |
| 1                          | 0                                       | 102          | 102 (100.0)             | 46 (45.1)                                    | 5 (4.9)                             | 0                                       | 97           | 97 (100.0)              | 38 (39.2)                                    | 7 (7.2)                             |
| 4                          | 11                                      | 91           | 78 (85.7)               | 36 (46.2)                                    | 3 (3.8)                             | 6                                       | 91           | 75 (82.4)               | 28 (37.3)                                    | 3 (4.0)                             |
| 8                          | 23                                      | 79           | 61 (77.2)               | 32 (52.5)                                    | 2 (3.3)                             | 17                                      | 80           | 62 (77.5)               | 27 (43.5)                                    | 4 (6.5)                             |
| 12                         | 37                                      | 65           | 46 (70.8)               | 18 (39.1)                                    | 0 (0.0)                             | 34                                      | 63           | 49 (77.8)               | 21 (42.9)                                    | 3 (6.1)                             |
| 16                         | 49                                      | 53           | 41 (77.4)               | 24 (58.5)                                    | 1 (2.4)                             | 45                                      | 52           | 40 (76.9)               | 20 (50.0)                                    | 3 (7.5)                             |
| 20                         | 57                                      | 45           | 34 (75.6)               | 19 (55.9)                                    | 0 (0.0)                             | 55                                      | 42           | 35 (83.3)               | 15 (42.9)                                    | 2 (5.7)                             |
| 24                         | 58                                      | 44           | 27 (61.4)               | 14 (51.9)                                    | 1 (3.7)                             | 58                                      | 39           | 26 (66.7)               | 11 (42.3)                                    | 1 (3.8)                             |
| 28                         | 65                                      | 37           | 21 (56.8)               | 11 (52.4)                                    | 1 (4.8)                             | 70                                      | 27           | 19 (70.4)               | 10 (52.6)                                    | 1 (5.3)                             |
| 32                         | 72                                      | 30           | 14 (46.7)               | 9 (64.3)                                     | 0 (0.0)                             | 76                                      | 21           | 12 (57.1)               | 6 (50.0)                                     | 2 (16.7)                            |
| 36                         | 76                                      | 26           | 13 (50.0)               | 7 (53.8)                                     | 0 (0.0)                             | 81                                      | 16           | 10 (62.5)               | 7 (70.0)                                     | 1 (10.0)                            |
| 40                         | 79                                      | 23           | 12 (52.2)               | 5 (41.7)                                     | 0 (0.0)                             | 82                                      | 15           | 8 (53.3)                | 5 (62.5)                                     | 1 (12.5)                            |
| 44                         | 85                                      | 17           | 6 (35.3)                | 3 (50.0)                                     | 0 (0.0)                             | 83                                      | 14           | 7 (50.0)                | 4 (57.1)                                     | 1 (14.3)                            |
| 48                         | 84                                      | 18           | 7 (38.9)                | 4 (57.1)                                     | 0 (0.0)                             | 84                                      | 13           | 5 (38.5)                | 3 (60.0)                                     | 0 (0.0)                             |
| 52                         | 86                                      | 16           | 4 (25.0)                | 2 (50.0)                                     | 0 (0.0)                             | 85                                      | 12           | 5 (41.7)                | 2 (40.0)                                     | 0 (0.0)                             |

\*n (%) unless otherwise indicated

**Table S9: Mean or median scores for each quality of life sub-scale or item and WHO performance status over time post stent up to week 16 by trial arm, time and treatment effects and time vs treatment interactions**

|                                           | Treatment group                    |                                    | Effect                                         |         |                                                |         | Treatment x time effect (p-value) |
|-------------------------------------------|------------------------------------|------------------------------------|------------------------------------------------|---------|------------------------------------------------|---------|-----------------------------------|
|                                           | UC                                 | EBRT                               | Time                                           |         | Treatment                                      |         |                                   |
|                                           | Mean (95%CI), n or Median (IQR), n | Mean (95%CI), n or Median (IQR), n | Adjusted mean difference (95% CI) <sup>1</sup> | p-value | Adjusted mean difference (95% CI) <sup>1</sup> | p-value |                                   |
| <b>EORTC-QLQC30/QLQ OG25 domain</b>       |                                    |                                    |                                                |         |                                                |         |                                   |
| <b>Global health (mean)</b>               |                                    |                                    |                                                |         |                                                |         |                                   |
| Week 1                                    | 49.4 (44.2-54.4), 99               | 40.2 (35.1-45.2), 95               | 0.12 (-0.25-0.49)                              | 0.516   | -1.99 (-6.59-2.62)                             | 0.398   | 0.66                              |
| Week 4                                    | 49.4 (44.5-54.4), 77               | 43.0 (36.5-49.5), 73               |                                                |         |                                                |         |                                   |
| Week 8                                    | 51.8 (45.3-58.3), 57               | 47.1 (40.4-53.7), 56               |                                                |         |                                                |         |                                   |
| Week 12                                   | 54.6 (46.8-62.4), 41               | 51.4 (45.0-57.9), 46               |                                                |         |                                                |         |                                   |
| Week 16                                   | 53.7 (46.7-60.7), 34               | 49.0 (41.5-56.5), 37               |                                                |         |                                                |         |                                   |
| <b>Odynophagia (median)</b>               |                                    |                                    |                                                |         |                                                |         |                                   |
| Week 1                                    | 16.7 (0-50), 101                   | 33.3 (16.7-66.7), 95               | -0.65 (-1.06- -0.23)                           | 0.002   | 2.69 (-2.52-7.91)                              | 0.311   | 0.694                             |
| Week 4                                    | 16.7 (0-33.3), 77                  | 16.7 (0-50), 74                    |                                                |         |                                                |         |                                   |
| Week 8                                    | 16.7 (0-33.3), 58                  | 16.7 (0-33.3), 59                  |                                                |         |                                                |         |                                   |
| Week 12                                   | 16.7 (0-33.3), 43                  | 16.7 (0-50), 46                    |                                                |         |                                                |         |                                   |
| Week 16                                   | 16.7 (0-33.3), 34                  | 16.7 (0-33.3), 35                  |                                                |         |                                                |         |                                   |
| <b>Dysphagia (median)</b>                 |                                    |                                    |                                                |         |                                                |         |                                   |
| Week 1                                    | 33.3 (16.6-44.4), 102              | 33.3 (22.2-66.7), 97               | -0.75 (-1.12- -0.38)                           | <0.001  | 4.21 (-0.56-8.98)                              | 0.084   | 0.013                             |
| Week 4                                    | 11.1 (0-33.3), 78                  | 22.2 (11.1-44.4), 75               |                                                |         |                                                |         |                                   |
| Week 8                                    | 11.1 (0-33.3), 60                  | 11.1 (11.1-33.3), 62               |                                                |         |                                                |         |                                   |
| Week 12                                   | 11.1 (0-33.3), 46                  | 11.1 (0-33.3), 49                  |                                                |         |                                                |         |                                   |
| Week 16                                   | 11.1 (11.1-33.3), 37               | 11.1 (0-33.3), 37                  |                                                |         |                                                |         |                                   |
| <b>Pain/discomfort OG25 (median)</b>      |                                    |                                    |                                                |         |                                                |         |                                   |
| Week 1                                    | 16.7 (0-33.3), 102                 | 16.7 (0-50), 94                    | -0.15 (-0.58-0.29)                             | 0.514   | 2.08 (-3.50-7.66)                              | 0.466   | 0.579                             |
| Week 4                                    | 16.7 (0-33.3), 77                  | 25 (0-33.3), 74                    |                                                |         |                                                |         |                                   |
| Week 8                                    | 16.7 (0-33.3), 59                  | 33.3 (0-50), 59                    |                                                |         |                                                |         |                                   |
| Week 12                                   | 16.7 (0-33.3), 44                  | 33.3 (0-66.7), 46                  |                                                |         |                                                |         |                                   |
| Week 16                                   | 16.7 (0-33.3), 34                  | 33.3 (0-33.3), 35                  |                                                |         |                                                |         |                                   |
| <b>Eating restriction (mean)</b>          |                                    |                                    |                                                |         |                                                |         |                                   |
| Week 1                                    | 52.9 (46.9-58.9), 102              | 56.3 (50.6-61.9), 95               | -0.45 (-0.87- -0.02)                           | 0.04    | 1.86 (-3.73-7.47)                              | 0.513   | 0.555                             |
| Week 4                                    | 44 (37.2-50.8), 75                 | 47.8 (40.4-55.2), 69               |                                                |         |                                                |         |                                   |
| Week 8                                    | 38.6 (31.6-45.6), 59               | 48.2 (40.3-56.1), 57               |                                                |         |                                                |         |                                   |
| Week 12                                   | 38.8 (30.4-47.1), 40               | 42.6 (33.3-51.8), 46               |                                                |         |                                                |         |                                   |
| Week 16                                   | 40.8 (31.4-50.2), 40               | 42.5 (33.3-51.6), 42               |                                                |         |                                                |         |                                   |
| <b>Eating in front of others (median)</b> |                                    |                                    |                                                |         |                                                |         |                                   |
| Week 1                                    | 0 (0-33.3), 98                     | 0 (0-66.7), 95                     | -0.37 (-0.86-0.12)                             | 0.138   | 1.51 (-4.47-7.49)                              | 0.622   | 0.117                             |

|                                       |                       |                      |                    |        |                    |       |       |
|---------------------------------------|-----------------------|----------------------|--------------------|--------|--------------------|-------|-------|
| Week 4                                | 0 (0-33.3), 74        | 0 (0-33.3), 73       |                    |        |                    |       |       |
| Week 8                                | 0 (0-33.3), 58        | 0 (0-33.3), 58       |                    |        |                    |       |       |
| Week 12                               | 0 (0-33.3), 42        | 33.3 (0-66.7), 45    |                    |        |                    |       |       |
| Week 16                               | 0 (0-0), 33           | 33.3 (0-66.7), 35    |                    |        |                    |       |       |
| <b>Physical functioning (median)</b>  |                       |                      |                    |        |                    |       |       |
| Week 1                                | 26.7 (8.3-53.3), 102  | 33.3 (13.3-53.3), 95 | 0.68 (0.34-1.03)   | <0.001 | 1.22 (-3.40-5.84)  | 0.604 | 0.643 |
| Week 4                                | 26.7 (13.3-53.3), 77  | 40 (13.3-60), 73     |                    |        |                    |       |       |
| Week 8                                | 33.3 (20-46.7), 59    | 40 (13.3-60), 57     |                    |        |                    |       |       |
| Week 12                               | 33.3 (13.3-46.7), 41  | 33.3 (20-53.3), 46   |                    |        |                    |       |       |
| Week 16                               | 33.3 (13.3-53.3), 30  | 33.3 (20-58.3), 34   |                    |        |                    |       |       |
| <b>Role functioning (mean)</b>        |                       |                      |                    |        |                    |       |       |
| Week 1                                | 44.6 (37.4-51.8), 102 | 48.6 (41.5-55.7), 95 | 0.41 (-0.09-0.91)  | 0.11   | 2.49 (-4.09-9.06)  | 0.459 | 0.75  |
| Week 4                                | 45.5 (37.5-53.6), 75  | 50 (42.0-58.0), 68   |                    |        |                    |       |       |
| Week 8                                | 43.7 (34.5-52.8), 58  | 51.9 (42.7-61.0), 54 |                    |        |                    |       |       |
| Week 12                               | 38.6 (27.6-49.6), 38  | 47.1 (37.1-57.1), 46 |                    |        |                    |       |       |
| Week 16                               | 44.9 (33.6-56.3), 36  | 47.1 (36.1-58.2), 41 |                    |        |                    |       |       |
| <b>Emotional functioning (median)</b> |                       |                      |                    |        |                    |       |       |
| Week 1                                | 25 (8.3-41.7), 99     | 25 (0-50), 95        | -0.26 (-0.59-0.06) | 0.114  | 0.50 (-3.65-4.64)  | 0.815 | 0.225 |
| Week 4                                | 25 (8.3-41.7), 77     | 25 (8.3-58.3), 73    |                    |        |                    |       |       |
| Week 8                                | 25 (0-33.3), 58       | 20.8 (8.3-41.7), 56  |                    |        |                    |       |       |
| Week 12                               | 16.7 (8.3-33.3), 41   | 25 (8.3-33.3), 46    |                    |        |                    |       |       |
| Week 16                               | 16.7 (0-33.3), 30     | 20.8 (8.3-50), 34    |                    |        |                    |       |       |
| <b>Cognitive functioning (median)</b> |                       |                      |                    |        |                    |       |       |
| Week 1                                | 16.7 (0-33.3), 99     | 16.7 (0-50), 95      | -0.14 (-0.47-0.18) | 0.392  | -0.35 (-4.64-3.94) | 0.874 | 0.007 |
| Week 4                                | 16.7 (0-33.3), 77     | 16.7 (0-50), 73      |                    |        |                    |       |       |
| Week 8                                | 16.7 (0-33.3), 58     | 16.7 (0-41.7), 56    |                    |        |                    |       |       |
| Week 12                               | 0 (0-16.7), 41        | 16.7 (0-33.3), 46    |                    |        |                    |       |       |
| Week 16                               | 0 (0-16.7), 30        | 25 (0-50), 34        |                    |        |                    |       |       |
| <b>Social functioning (median)</b>    |                       |                      |                    |        |                    |       |       |
| Week 1                                | 33.3 (0-66.7), 99     | 33.3 (0-66.7), 95    | 0.62 (0.15-1.09)   | 0.01   | 2.43 (-3.84-8.71)  | 0.447 | 0.351 |
| Week 4                                | 33.3 (0-66.7), 77     | 33.3 (0-66.7), 73    |                    |        |                    |       |       |
| Week 8                                | 33.3 (0-66.7), 57     | 33.3 (8.3-66.7), 56  |                    |        |                    |       |       |
| Week 12                               | 33.3 (0-50), 41       | 33.3 (16.7-66.7), 46 |                    |        |                    |       |       |
| Week 16                               | 33.3 (0-66.7), 30     | 33.3 (16.7-66.7), 34 |                    |        |                    |       |       |
| <b>Fatigue (median)</b>               |                       |                      |                    |        |                    |       |       |
| Week 1                                | 44.4 (22.2-77.8), 102 | 55.6 (33.3-77.8), 95 | 0.37 (-0.02-0.77)  | 0.065  | 3.50 (-1.68-8.68)  | 0.186 | 0.522 |
| Week 4                                | 44.4 (33.3-66.7), 77  | 66.7 (33.3-88.9), 73 |                    |        |                    |       |       |
| Week 8                                | 44.4 (33.3-66.7), 59  | 44.4 (33.3-77.8), 57 |                    |        |                    |       |       |
| Week 12                               | 44.4 (22.2-66.7), 41  | 55.6 (33.3-66.7), 46 |                    |        |                    |       |       |

|                                 |                       |                      |                      |       |                     |       |       |
|---------------------------------|-----------------------|----------------------|----------------------|-------|---------------------|-------|-------|
| Week 16                         | 44.4 (33.3-66.7), 30  | 44.4 (33.3-77.8), 34 |                      |       |                     |       |       |
| <b>Nausea/vomiting (median)</b> |                       |                      |                      |       |                     |       |       |
| Week 1                          | 16.7 (0-50), 102      | 33.3 (16.7-66.7), 95 | -0.54 (-0.98- -0.10) | 0.017 | 5.60 (0.11-11.08)   | 0.046 | 0.195 |
| Week 4                          | 16.7 (0-33.3), 77     | 33.3 (0-50), 73      |                      |       |                     |       |       |
| Week 8                          | 16.7 (0-33.3), 59     | 16.7 (0-33.3), 57    |                      |       |                     |       |       |
| Week 12                         | 16.7 (0-33.3), 41     | 16.7 (0-33.3), 46    |                      |       |                     |       |       |
| Week 16                         | 0 (0-33.3), 30        | 16.7 (0-33.3), 34    |                      |       |                     |       |       |
| <b>Pain C30 (median)</b>        |                       |                      |                      |       |                     |       |       |
| Week 1                          | 33.3 (16.7-66.7), 102 | 50 (16.7-66.7), 95   | -0.56 (-1.01- -0.11) | 0.015 | 2.39 (-3.25-8.03)   | 0.406 | 0.005 |
| Week 4                          | 33.3 (16.7-50), 77    | 33.3 (16.7-66.7), 73 |                      |       |                     |       |       |
| Week 8                          | 16.7 (0-33.3), 58     | 33.3 (16.7-66.7), 57 |                      |       |                     |       |       |
| Week 12                         | 16.7 (0-50), 41       | 33.3 (16.7-66.7), 46 |                      |       |                     |       |       |
| Week 16                         | 16.7 (0-50), 30       | 50 (16.7-83.3), 34   |                      |       |                     |       |       |
| <b>Dyspnoea (median)</b>        |                       |                      |                      |       |                     |       |       |
| Week 1                          | 33.3 (0-33.3), 102    | 33.3 (0-66.7), 94    | 0.17 (-0.25-0.59)    | 0.427 | 2.50 (-3.03-8.02)   | 0.376 | 0.169 |
| Week 4                          | 33.3 (0-33.3), 77     | 33.3 (0-66.7), 73    |                      |       |                     |       |       |
| Week 8                          | 33.3 (0-33.3), 59     | 33.3 (0-33.3), 57    |                      |       |                     |       |       |
| Week 12                         | 33.3 (0-33.3), 41     | 33.3 (0-66.7), 46    |                      |       |                     |       |       |
| Week 16                         | 33.3 (0-33.3), 30     | 33.3 (0-66.7), 34    |                      |       |                     |       |       |
| <b>Insomnia (mean)</b>          |                       |                      |                      |       |                     |       |       |
| Week 1                          | 37.6 (30.8-44.4), 102 | 44.2 (36.7-51.7), 95 | -0.70 (-1.21- -0.18) | 0.009 | 6.76 (-0.10-13.42)  | 0.047 | 0.688 |
| Week 4                          | 32.9 (25.2-40.6), 74  | 42.3 (32.7-51.8), 67 |                      |       |                     |       |       |
| Week 8                          | 25.9 (17.6-34.1), 58  | 36.4 (26.4-46.5), 54 |                      |       |                     |       |       |
| Week 12                         | 21.6 (11.4-31.8), 37  | 31.9 (21.8-41.9), 45 |                      |       |                     |       |       |
| Week 16                         | 29.6 (18.9-40.3), 36  | 37.5 (25.6-49.4), 40 |                      |       |                     |       |       |
| <b>Appetite loss (mean)</b>     |                       |                      |                      |       |                     |       |       |
| Week 1                          | 50.8 (43.6-58.0), 101 | 62.8 (55.4-70.2), 94 | -0.30 (-0.90-0.30)   | 0.56  | 6.42 (-1.18-14.02)  | 0.098 | 0.612 |
| Week 4                          | 52.9 (45.1-60.7), 75  | 55.9 (46.6-65.2), 68 |                      |       |                     |       |       |
| Week 8                          | 37.9 (29.0-46.8), 58  | 55.8 (46.4-65.1), 55 |                      |       |                     |       |       |
| Week 12                         | 45.9 (33.0-58.9), 37  | 47.8 (36.9-58.8), 46 |                      |       |                     |       |       |
| Week 16                         | 41.7 (31.1-52.2), 36  | 49.6 (38.8-60.4), 41 |                      |       |                     |       |       |
| <b>Constipation (mean)</b>      |                       |                      |                      |       |                     |       |       |
| Week 1                          | 42.4 (35.9-48.9), 99  | 41.1 (34.2-47.9), 95 | -0.95 (-1.49- -0.41) | 0.003 | -4.33 (-10.78-2.12) | 0.24  | 0.009 |
| Week 4                          | 48.0 (40.3-55.7), 75  | 44.1 (35.1-53.1), 68 |                      |       |                     |       |       |
| Week 8                          | 30.4 (22.5-38.3), 57  | 35.8 (27.2-44.4), 54 |                      |       |                     |       |       |
| Week 12                         | 22.8 (13.6-32.0), 38  | 37.7 (28.7-46.7), 46 |                      |       |                     |       |       |
| Week 16                         | 27.8 (18.6-36.9), 36  | 41.5 (31.0-51.9), 41 |                      |       |                     |       |       |
| <b>Diarrhoea (median)</b>       |                       |                      |                      |       |                     |       |       |
| Week 1                          | 0 (0-0), 98           | 0 (0-33.3), 95       | 0.15 (-0.28-0.59)    | 0.493 | 2.81 (-2.27-7.89)   | 0.279 | 0.147 |

|                                        |                       |                      |                      |        |                    |       |       |
|----------------------------------------|-----------------------|----------------------|----------------------|--------|--------------------|-------|-------|
| Week 4                                 | 0 (0-0), 77           | 0 (0-33.3), 72       |                      |        |                    |       |       |
| Week 8                                 | 0 (0-33.3), 57        | 0 (0-0), 56          |                      |        |                    |       |       |
| Week 12                                | 0 (0-33.3), 41        | 0 (0-0), 45          |                      |        |                    |       |       |
| Week 16                                | 0 (0-0), 30           | 0 (0-33.3), 34       |                      |        |                    |       |       |
| <b>Financial difficulties (median)</b> |                       |                      |                      |        |                    |       |       |
| Week 1                                 | 0 (0-0), 99           | 0 (0-33.3), 94       | -0.15 (-0.47-0.17)   | 0.4    | -0.27 (-4.46-3.91) | 0.899 | 0.445 |
| Week 4                                 | 0 (0-0), 76           | 0 (0-0), 73          |                      |        |                    |       |       |
| Week 8                                 | 0 (0-0), 56           | 0 (0-0), 56          |                      |        |                    |       |       |
| Week 12                                | 0 (0-0), 41           | 0 (0-0), 46          |                      |        |                    |       |       |
| Week 16                                | 0 (0-0), 29           | 0 (0-33.3), 34       |                      |        |                    |       |       |
| <b>Body image (median)</b>             |                       |                      |                      |        |                    |       |       |
| Week 1                                 | 0 (0-33.3), 101       | 0 (0-66.7), 94       | -0.15 (-0.66-0.36)   | 0.92   | -2.23 (-8.66-4.20) | 0.496 | 0.011 |
| Week 4                                 | 0 (0-33.3), 75        | 0 (0-33.3), 74       |                      |        |                    |       |       |
| Week 8                                 | 0 (0-33.3), 59        | 33.3 (0-66.7), 59    |                      |        |                    |       |       |
| Week 12                                | 0 (0-33.3), 44        | 0 (0-66.7), 45       |                      |        |                    |       |       |
| Week 16                                | 0 (0-0), 33           | 33.3 (0-66.7), 34    |                      |        |                    |       |       |
| <b>Reflux (median)</b>                 |                       |                      |                      |        |                    |       |       |
| Week 1                                 | 33.3 (0-50), 102      | 33.3 (0-66.7), 95    | -0.55 (-0.96- -0.15) | 0.007  | 0.72 (-4.47-5.92)  | 0.785 | 0.825 |
| Week 4                                 | 16.7 (0-33.3), 77     | 33.3 (0-50), 74      |                      |        |                    |       |       |
| Week 8                                 | 16.7 (0-50), 59       | 16.7 (0-33.3), 59    |                      |        |                    |       |       |
| Week 12                                | 16.7 (0-50), 44       | 16.7 (0-50), 46      |                      |        |                    |       |       |
| Week 16                                | 8.33 (0-33.3), 34     | 33.3 (0-50), 35      |                      |        |                    |       |       |
| <b>Anxiety (mean)</b>                  |                       |                      |                      |        |                    |       |       |
| Week 1                                 | 55.4 (49.2-61.6), 102 | 51.2 (44.6-57.9), 95 | -0.91 (-1.32- -0.50) | <0.001 | -2.87 (-8.45-2.71) | 0.313 | 0.002 |
| Week 4                                 | 49.6 (42.4-56.7), 75  | 47.6 (39.3-55.9), 69 |                      |        |                    |       |       |
| Week 8                                 | 45.5 (38.1-52.8), 59  | 44.2 (36.1-52.2), 57 |                      |        |                    |       |       |
| Week 12                                | 38.8 (29.4-48.1), 40  | 49.3 (40.1-58.4), 46 |                      |        |                    |       |       |
| Week 16                                | 40 (30.5-49.5), 40    | 46.8 (35.9-57.8), 42 |                      |        |                    |       |       |
| <b>Dry mouth (median)</b>              |                       |                      |                      |        |                    |       |       |
| Week 1                                 | 33.3 (0-66.7), 100    | 33.3 (0-66.7), 95    | -0.58 (-1.08- 0.09)  | 0.022  | 0.64 (-5.61-6.89)  | 0.84  | 0.816 |
| Week 4                                 | 33.3 (0-66.7), 77     | 33.3 (0-66.7), 74    |                      |        |                    |       |       |
| Week 8                                 | 0 (0-33.3), 59        | 33.3 (0-66.7), 59    |                      |        |                    |       |       |
| Week 12                                | 16.7 (0-33.3), 44     | 33.3 (0-33.3), 43    |                      |        |                    |       |       |
| Week 16                                | 0 (0-33.3), 34        | 33.3 (0-66.7), 34    |                      |        |                    |       |       |
| <b>Trouble with taste (median)</b>     |                       |                      |                      |        |                    |       |       |
| Week 1                                 | 0 (0-33.3), 101       | 33.3 (0-66.7), 95    | 0.44 (-0.05-0.94)    | 0.079  | 1.08 (-5.39-7.55)  | 0.744 | 0.547 |
| Week 4                                 | 0 (0-66.7), 76        | 0 (0-66.7), 73       |                      |        |                    |       |       |
| Week 8                                 | 0 (0-33.3), 59        | 0 (0-66.7), 59       |                      |        |                    |       |       |
| Week 12                                | 16.7 (0-50), 44       | 33.3 (0-33.3), 46    |                      |        |                    |       |       |



|                                           |                       |                      |                      |        |                    |       |       |
|-------------------------------------------|-----------------------|----------------------|----------------------|--------|--------------------|-------|-------|
| Week 16                                   | 0 (0-33.3), 33        | 33.3 (0-66.7), 34    |                      |        |                    |       |       |
| <b>Trouble swallowing saliva (median)</b> |                       |                      |                      |        |                    |       |       |
| Week 1                                    | 0 (0-33.3), 102       | 0 (0-33.3), 95       | -0.79 (-1.22- -0.36) | <0.001 | -1.84 (-7.31-3.63) | 0.511 | 0.025 |
| Week 4                                    | 0 (0-33.3), 76        | 0 (0-33.3), 74       |                      |        |                    |       |       |
| Week 8                                    | 0 (0-33.3), 59        | 0 (0-33.3), 59       |                      |        |                    |       |       |
| Week 12                                   | 0 (0-33.3), 44        | 0 (0-33.3), 46       |                      |        |                    |       |       |
| Week 16                                   | 0 (0-0), 34           | 0 (0-33.3), 35       |                      |        |                    |       |       |
| <b>Choked when swallowing (median)</b>    |                       |                      |                      |        |                    |       |       |
| Week 1                                    | 0 (0-33.3), 102       | 0 (0-33.3), 95       | -0.49 (-0.86-0.11)   | 0.011  | -0.74 (-5.29-3.80) | 0.749 | 0.321 |
| Week 4                                    | 0 (0-0), 77           | 0 (0-33.3), 74       |                      |        |                    |       |       |
| Week 8                                    | 0 (0-0), 59           | 0 (0-33.3), 59       |                      |        |                    |       |       |
| Week 12                                   | 0 (0-0), 44           | 0 (0-0), 46          |                      |        |                    |       |       |
| Week 16                                   | 0 (0-0), 34           | 0 (0-0), 35          |                      |        |                    |       |       |
| <b>Trouble with coughing (median)</b>     |                       |                      |                      |        |                    |       |       |
| Week 1                                    | 33.3 (0-33.3), 101    | 33.3 (0-33.3), 95    | -0.28 (-0.71-0.15)   | 0.202  | -0.62 (-5.94-4.70) | 0.82  | 0.37  |
| Week 4                                    | 33.3 (0-33.3), 77     | 33.3 (0-33.3), 74    |                      |        |                    |       |       |
| Week 8                                    | 33.3 (0-33.3), 59     | 33.3 (0-33.3), 57    |                      |        |                    |       |       |
| Week 12                                   | 33.3 (0-33.3), 43     | 33.3 (0-33.3), 46    |                      |        |                    |       |       |
| Week 16                                   | 33.3 (0-33.3), 34     | 33.3 (0-33.3), 34    |                      |        |                    |       |       |
| <b>Trouble talking (median)</b>           |                       |                      |                      |        |                    |       |       |
| Week 1                                    | 0 (0-0), 99           | 0 (0-33.3), 94       | 0.00 (-0.33-0.33)    | 0.99   | 0.56 (-3.55-4.67)  | 0.79  | 0.487 |
| Week 4                                    | 0 (0-0), 75           | 0 (0-33.3), 74       |                      |        |                    |       |       |
| Week 8                                    | 0 (0-0), 59           | 0 (0-0), 58          |                      |        |                    |       |       |
| Week 12                                   | 0 (0-0), 44           | 0 (0-0), 45          |                      |        |                    |       |       |
| Week 16                                   | 0 (0-0), 34           | 0 (0-33.3), 35       |                      |        |                    |       |       |
| <b>Weight loss (mean)</b>                 |                       |                      |                      |        |                    |       |       |
| Week 1                                    | 40.6 (33.2-48.0), 101 | 41.8 (34.0-49.5), 95 | -0.56 (-1.06-0.05)   | 0.03   | -1.01 (-7.71-5.69) | 0.767 | 0.053 |
| Week 4                                    | 43.7 (35.3-52.1), 74  | 45.4 (36.6-54.2), 69 |                      |        |                    |       |       |
| Week 8                                    | 32.8 (23.9-41.7), 59  | 36.3 (27.6-45.0), 56 |                      |        |                    |       |       |
| Week 12                                   | 30.0 (18.7-41.3), 40  | 42.8 (33.3-52.2), 46 |                      |        |                    |       |       |
| Week 16                                   | 30.8 (19.2-42.5), 40  | 42.1 (30.8-53.3), 42 |                      |        |                    |       |       |
| <b>Hair loss (median)</b>                 |                       |                      |                      |        |                    |       |       |
| Week 1                                    | 0 (0-0), 17           | 0 (0-33.3), 21       | 0.10 (-0.58-0.77)    | 0.781  | 0.61(-7.98-9.20)   | 0.889 | 0.16  |
| Week 4                                    | 0 (0-0), 13           | 0 (0-16.7), 16       |                      |        |                    |       |       |
| Week 8                                    | 0 (0-33.3), 15        | 0 (0-33.3)11         |                      |        |                    |       |       |
| Week 12                                   | 33.3 (0-33.3), 10     | 16.7 (0-33.3), 12    |                      |        |                    |       |       |
| Week 16                                   | 0 (0-0), 11           | 0 (0-33.3), 8        |                      |        |                    |       |       |
| <b>WHO performance status (mean)</b>      |                       |                      |                      |        |                    |       |       |
| Week 1                                    | 1.30 (1.16-1.45), 102 | 1.32 (1.19-1.45), 97 | 0.03 (0.02-0.04)     | <0.001 | 0.06 (-0.09-0.20)  | 0.457 | 0.565 |

|         |                      |                      |  |  |  |  |  |
|---------|----------------------|----------------------|--|--|--|--|--|
| Week 4  | 1.47 (1.30-1.64), 76 | 1.61 (1.44-1.79), 75 |  |  |  |  |  |
| Week 8  | 1.57 (1.34-1.80), 63 | 1.73 (1.52-1.95), 60 |  |  |  |  |  |
| Week 12 | 1.44 (1.21-1.67), 48 | 1.55 (1.35-1.75), 49 |  |  |  |  |  |
| Week 16 | 1.52 (1.27-1.77), 42 | 1.77 (1.55-2.00), 44 |  |  |  |  |  |

**Table S10: Additional palliative radiotherapy given, by trial arm**

|                                                  | <b>UC*</b>          | <b>EBRT*</b>      |
|--------------------------------------------------|---------------------|-------------------|
|                                                  | N=102               | N=97              |
| <b>Additional palliative radiotherapy - N(%)</b> |                     |                   |
| Yes**                                            | 20 (19.6)           | 9 (9.3)           |
| No                                               | 82 (80.4)           | 88 (90.7)         |
| <b>If yes, Organ/Region - N(%)</b>               |                     |                   |
| Oesophagus***                                    | 16 (80.0)           | 2 (22.2)          |
| Bilateral sub clavian fossa                      | 1 (5.0)             | 0 (0.0)           |
| Brain                                            | 1 (5.0)             | 1 (11.1)          |
| Femur                                            | 1 (5.0)             | 0 (0.0)           |
| Gastro-oesophageal junction                      | 1 (5.0)             | 0 (0.0)           |
| L1-L3 vertebrae and left pelvis                  | 0 (0.0)             | 1 (11.1)          |
| L4-S1                                            | 0 (0.0)             | 1 (11.1)          |
| Left lung                                        | 1 (5.0)             | 0 (0.0)           |
| Left supraclavicular fossa                       | 0 (0.0)             | 1 (11.1)          |
| Lumbar spine                                     | 0 (0.0)             | 1 (11.1)          |
| Posterior ribs                                   | 0 (0.0)             | 1 (11.1)          |
| Right hip                                        | 1 (5.0)             | 0 (0.0)           |
| Scapula                                          | 0 (0.0)             | 2 (22.2)          |
| Total dose (Gy) - median(IQR), n                 | 20.0 (8.0-30.0), 19 | 8.0 (8.0-20.0), 9 |
| Total fractions - median(IQR), n                 | 5.0 (3.0-10.0), 19  | 1.0 (1.0-5.0), 9  |

\* n(%) unless otherwise indicated

\*\* post hoc RR 0.47 [95% CI 0.23-0.99] p=0.039

\*\*\* post hoc RR 0.28 [95% CI 0.08-0.96] p=0.0030

**Table S11: Post-stent insertion chemotherapy**

|                                                                                | <b>UC*</b>        | <b>EBRT*</b>      |
|--------------------------------------------------------------------------------|-------------------|-------------------|
|                                                                                | N=102             | N=97              |
| <b>MDT intention to give chemotherapy</b>                                      |                   |                   |
| At baseline, MDT intend to give chemotherapy                                   | 36 (35.3)         | 34 (35.1)         |
| Of those, what proportion did get chemotherapy**                               | 29 (80.6)         | 15 (44.1)         |
| <b>Received chemotherapy for oesophageal cancer given post stent insertion</b> |                   |                   |
| Yes                                                                            | 33 (32.4)         | 17 (16.7)         |
| No                                                                             | 68 (66.7)         | 79 (77.5)         |
| Missing                                                                        | 1 (1.0)           | 1 (1.0)           |
| If yes, which?***                                                              |                   |                   |
| ECF                                                                            | 2 (6.1)           | 1 (5.9)           |
| CAP                                                                            | 2 (6.1)           | 0 (0.0)           |
| EOX                                                                            | 13 (39.4)         | 8 (47.1)          |
| 5FU                                                                            | 1 (3.0)           | 0 (0.0)           |
| Other                                                                          | 31 (93.9)         | 13 (76.5)         |
| 1) ECX x 3cycle. 2) Docetaxel x3 cycles. 3) Irinotecan.                        | 0 (0.0)           | 1 (5.9)           |
| 315 TRAS, C2+PLAT                                                              | 1 (3.0)           | 0 (0.0)           |
| CX                                                                             | 4 (12.1)          | 1 (5.9)           |
| CX + Herceptin                                                                 | 6 (18.2)          | 2 (11.8)          |
| Capecitabine                                                                   | 2 (6.1)           | 0 (0.0)           |
| Carboplatin                                                                    | 1 (3.0)           | 0 (0.0)           |
| Carboplatin + Epirubicin                                                       | 1 (3.0)           | 0 (0.0)           |
| Carboplatin + Herceptin                                                        | 0 (0.0)           | 2 (11.8)          |
| Carboplatin + Paclitaxel                                                       | 1 (3.0)           | 1 (5.9)           |
| Cisplatin                                                                      | 2 (6.1)           | 1 (5.9)           |
| Docetaxel                                                                      | 4 (12.1)          | 1 (5.9)           |
| Durvalumab                                                                     | 1 (3.0)           | 0 (0.0)           |
| ECX                                                                            | 0 (0.0)           | 1 (5.9)           |
| Epirubicin + Oxaliplatin                                                       | 1 (3.0)           | 0 (0.0)           |
| Folfiri                                                                        | 1 (3.0)           | 0 (0.0)           |
| Herceptin                                                                      | 0 (0.0)           | 1 (5.9)           |
| Irinotecan                                                                     | 0 (0.0)           | 1 (5.9)           |
| OxCap                                                                          | 2 (6.1)           | 0 (0.0)           |
| Oxaliplatin                                                                    | 2 (6.1)           | 0 (0.0)           |
| Paclitaxel                                                                     | 1 (3.0)           | 0 (0.0)           |
| Paclitaxel and Ramucirumab                                                     | 1 (3.0)           | 0 (0.0)           |
| Raltitrexed Oxaliplatin                                                        | 0 (0.0)           | 1 (5.9)           |
| Intended number of cycles-median(IQR), n                                       | 6.0 (4.0-6.0), 29 | 6.0 (4.0-6.0), 16 |
| Intended number of cycles missing                                              | 4 (12.1)          | 1 (5.9)           |
| Number of cycles given-median(IQR), n                                          | 3.0 (2.0-4.0), 33 | 4.0 (3.0-4.0), 16 |
| Number of cycles given missing                                                 | 0 (0.0)           | 1 (5.9)           |

\*n (%) unless otherwise indicated

\*\* post hoc RR 0.55 [95% CI 0.36-0.83] p= 0.0016

\*\*\*Some patients had more than one

**Table S12: Results of the cost-utility analysis for 1,000 simulated patients (including 500 patients in each of the two trial arms)**

|                                    | <b>UC</b>                    | <b>EBRT</b> | <b>Difference</b> |
|------------------------------------|------------------------------|-------------|-------------------|
| <b>Total cost</b>                  | £2,313,998                   | £3,078,427  | £764,429          |
| <b>Average cost per patient</b>    | £4,628                       | £6,157      | £1,529            |
| <b>Total QALYs</b>                 | 55.32                        | 53.93       | -1.3919           |
| <b>Average QALYs per patient</b>   | 0.1106                       | 0.108       | -0.00278          |
| <b>ICER (Cost per QALY gained)</b> | <b>Dominated (-£549,200)</b> |             |                   |

**Table S13: Results of the one-way sensitivity health economic analyses**

| SA-ID     | Parameter                    | Change                         | ICER      |           |
|-----------|------------------------------|--------------------------------|-----------|-----------|
|           |                              |                                | 12 weeks  | 12 months |
| Base case | n/a                          | n/a                            | Dominated | Dominated |
| SA1       | Costs                        | -10%                           | Dominated | Dominated |
| SA2       | Costs                        | -20%                           | Dominated | Dominated |
| SA3       | Costs                        | -30%                           | Dominated | Dominated |
| SA4       | Costs                        | +10%                           | Dominated | Dominated |
| SA5       | Costs                        | +20%                           | Dominated | Dominated |
| SA6       | Costs                        | +30%                           | Dominated | Dominated |
| SA7       | Costs                        | Intervention cost micro-costed | Dominated | Dominated |
| SA8       | Utilities                    | -10%                           | Dominated | Dominated |
| SA9       | Utilities                    | -20%                           | Dominated | Dominated |
| SA10      | Utilities                    | -30%                           | Dominated | Dominated |
| SA11      | Utilities                    | +10%                           | Dominated | Dominated |
| SA12      | Utilities                    | +20%                           | Dominated | Dominated |
| SA13      | Utilities                    | +30%                           | Dominated | Dominated |
| SA14      | All parameters               | Complete cases used            | Dominated | Dominated |
| SA15      | All parameters               | All available cases used       | Dominated | Dominated |
| SA16      | All parameters post 12 weeks | Weeks 13 to 16 used            | Dominated | Dominated |
| SA17      | All parameters post 12 weeks | Weeks 13 to 28 used            | Dominated | Dominated |

**Table S14: Baseline prior chemotherapy**

|                                                             | UC*               | EBRT*             |
|-------------------------------------------------------------|-------------------|-------------------|
|                                                             | N=102             | N=97              |
| <b>Previous chemotherapy given</b>                          |                   |                   |
| No                                                          | 87 (85.3)         | 74 (76.3)         |
| Yes                                                         | 15 (14.7)         | 23 (23.7)         |
| <i>EOX</i>                                                  | 6 (5.9)           | 7 (6.9)           |
| <i>ECX</i>                                                  | 4 (3.9)           | 3 (2.9)           |
| <i>Cisplatin+Capecitabine</i>                               | 1 (1.0)           | 3 (2.9)           |
| <i>CX; OxCap</i>                                            | 0 (0.0)           | 2 (2.0)           |
| <i>OxCap</i>                                                | 2 (2.0)           | 0 (0.0)           |
| <i>Carboplatin+Capecitabine+Epirubicin</i>                  | 0 (0.0)           | 1 (1.0)           |
| <i>Carboplatin+Paclitaxel</i>                               | 0 (0.0)           | 1 (1.0)           |
| <i>Cisplatin; 5FU</i>                                       | 0 (0.0)           | 1 (1.0)           |
| <i>Cisplatin+Epirubicin</i>                                 | 0 (0.0)           | 1 (1.0)           |
| <i>CX</i>                                                   | 1 (1.0)           | 0 (0.0)           |
| <i>CX+Herceptin; Docetaxel</i>                              | 0 (0.0)           | 1 (1.0)           |
| <i>Docetaxel; Irinotecan</i>                                | 0 (0.0)           | 1 (1.0)           |
| <i>ECF</i>                                                  | 0 (0.0)           | 1 (1.0)           |
| <i>ECX neoadjuvant; EOX</i>                                 | 0 (0.0)           | 1 (1.0)           |
| <i>EOX; Docetaxel</i>                                       | 1 (1.0)           | 0 (0.0)           |
| <b>If had prior chemotherapy</b>                            |                   |                   |
| Intended number of cycles - median(IQR), n                  | 6.0 (4.0-8.0), 15 | 4.0 (3.0-6.0), 21 |
| Intended number of cycles missing                           | 0 (0.0)           | 2 (8.7)           |
| Number of prior chemotherapy cycles given – median (IQR), n | 3.0 (2.0-6.0), 15 | 4.0 (3.0-6.0), 23 |

\*n (%) unless otherwise indicated

**Table S15: List of recruiting sites**

| <b>Site</b>                                                             | <b>Principal Investigator</b>            | <b>Patients randomised</b> |
|-------------------------------------------------------------------------|------------------------------------------|----------------------------|
| Ninewells Hospital, NHS Tayside Dundee                                  | Dr Douglas Adamson                       | 61                         |
| University Hospitals Bristol NHS Foundation Trust Royal Infirmary       | Professor Jane Blazeby                   | 27                         |
| Weston Park, Sheffield Teaching Hospitals NHS Foundation Trust          | Dr Jonathan Wadsley                      | 18                         |
| University Hospital of Wales, Cardiff and Vale University Health Board  | Dr Anthony Byrne                         | 12                         |
| University Hospital Coventry, Coventry and Warwickshire NHS Trust       | Dr Martin Scott-Brown                    | 10                         |
| University Hospital Llandough, Cardiff and Vale University Health Board | Dr Anthony Byrne                         | 9                          |
| Musgrove Park Hospital, Taunton and Somerset NHS Foundation Trust       | Dr Julie Walther                         | 9                          |
| Basildon and Thurrock University Hospitals Foundation NHS Trust         | Dr Olivia Chan                           | 8                          |
| St Mary's Hospital, Imperial College Healthcare                         | Dr D A Power                             | 8                          |
| Nottingham University Hospitals NHS Trust                               | Dr Ravi Vohra/Dr Eleanor James           | 7                          |
| Royal Glamorgan Hospital, Cwm Taff Morgannwg University Health Board    | Dr Paul Shaw                             | 7                          |
| Weston Super Mare Hospital, Weston Area Health Trust                    | Dr Serena Hilman                         | 7                          |
| Worthing Hospital, Western Sussex Hospitals NHS Foundation trust        | Dr Angus Robinson/Dr Elizabeth Selvaduri | 6                          |
| Conquest Hospital Hastings, East Sussex Healthcare NHS Trust            | Dr Angus Robinson                        | 5                          |
| Royal Sussex Hospital Brighton, East Sussex Healthcare NHS Trust        | Dr Angus Robinson                        | 4                          |
| University Hospital Southampton Foundation Trust                        | Dr Andrew Bateman                        | 3                          |
| George Eliot Hospital NHS Trust                                         | Dr Martin Scott-Brown                    | 3                          |
| Kent and Canterbury Hospital, East Kent Hospitals NHS Foundation Trust  | Dr Mathilda Cominos                      | 3                          |
| King's Mill Hospital, Sherwood Forest Hospitals NHS Foundation Trust    | Dr Eleanor James                         | 3                          |
| Doncaster and Bassetlaw Hospitals Hospitals NHS Foundation Trust        | Dr Jonathan Wadsley                      | 3                          |
| Southend University Hospital Hospitals NHS Foundation Trust             | Dr Olivia Chan/Dr David Tsang            | 3                          |
| Royal Gwent Hospital, Aneurin Bevan University Health Board             | Professor Ashraf Rasheed                 | 2                          |
| James Cook Hospital, South Tees Hospitals NHS Foundation Trust          | Dr Nick Wadd                             | 2                          |
|                                                                         |                                          | 220                        |

## Supplementary figures

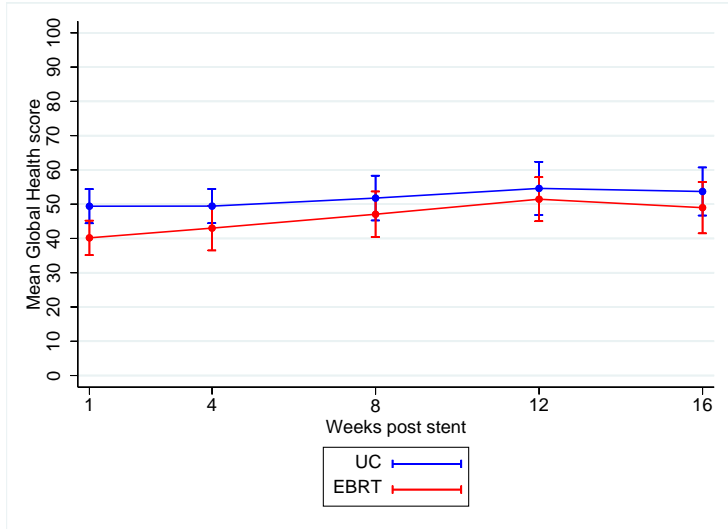

**Figure S1: Mean Global Health scores (EORTC-QLQ-C30) and 95% confidence intervals by time and treatment group**

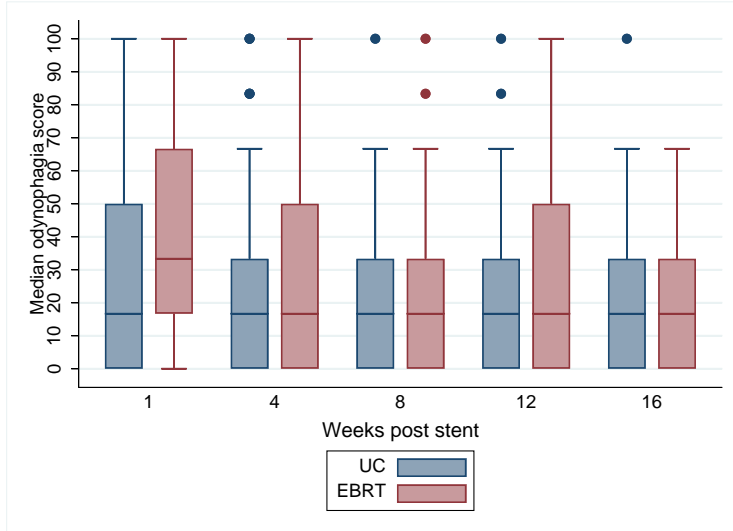

**Figure S2: Box plots of odynophagia scores by time and treatment group**

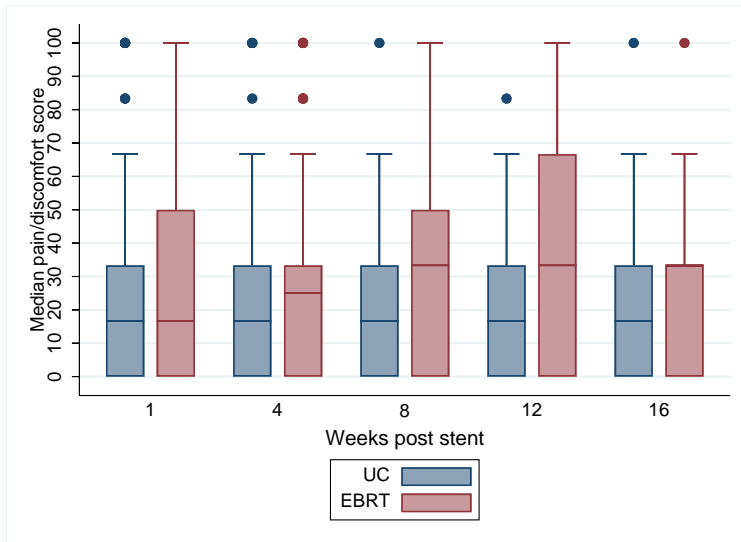

**Figure S3: Box plots of pain/discomfort scores (QLQ-OG25 questionnaire) by time and treatment**

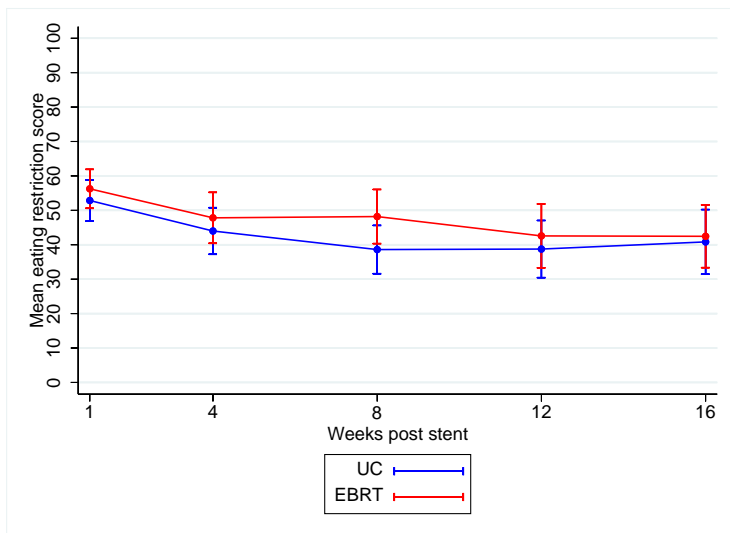

**Figure S4: Mean eating restrictions scores and 95% confidence intervals by time and treatment group**



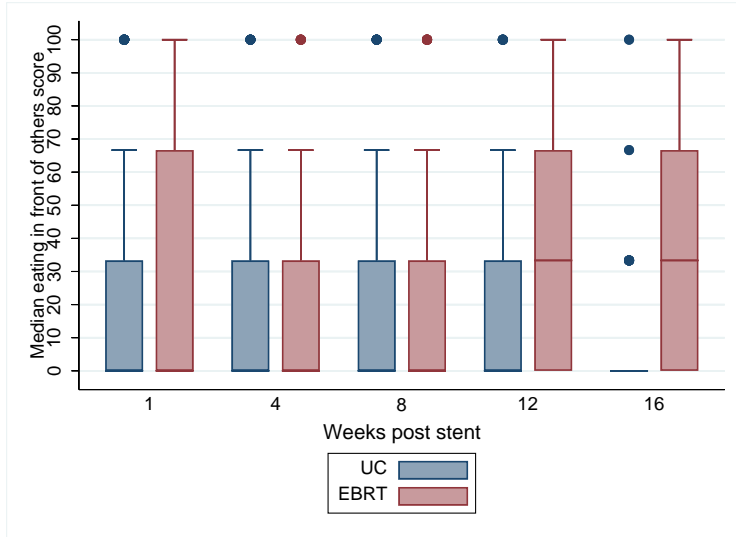

**Figure S5: Box plots of “eating in front of others” scores by time and treatment group**

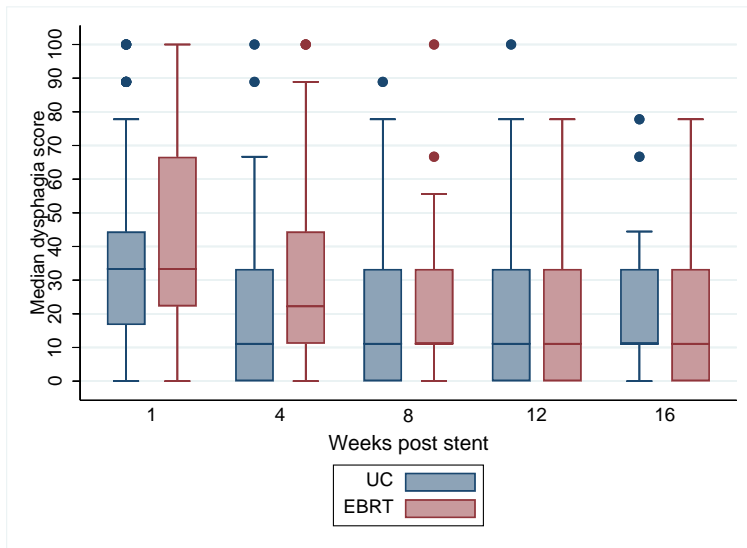

**Figure S6: Box plots of dysphagia scores by time and treatment group**

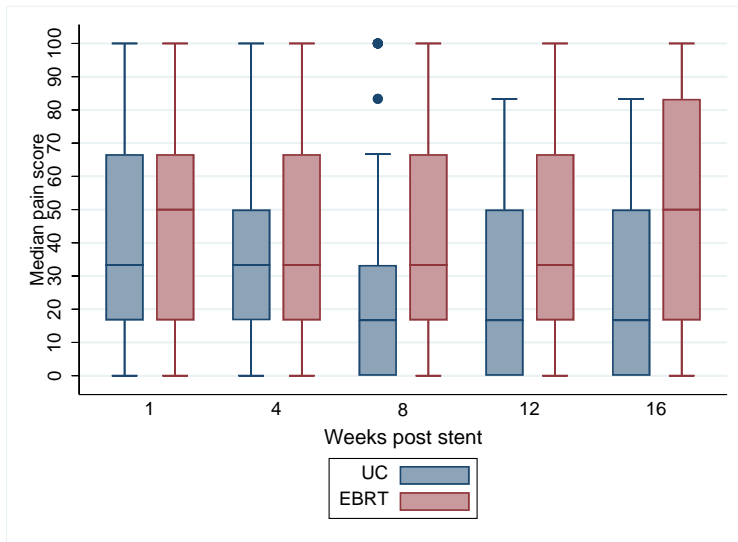

**Figure S7: Box plots of pain scores (QLQ-C30) by time and treatment group**

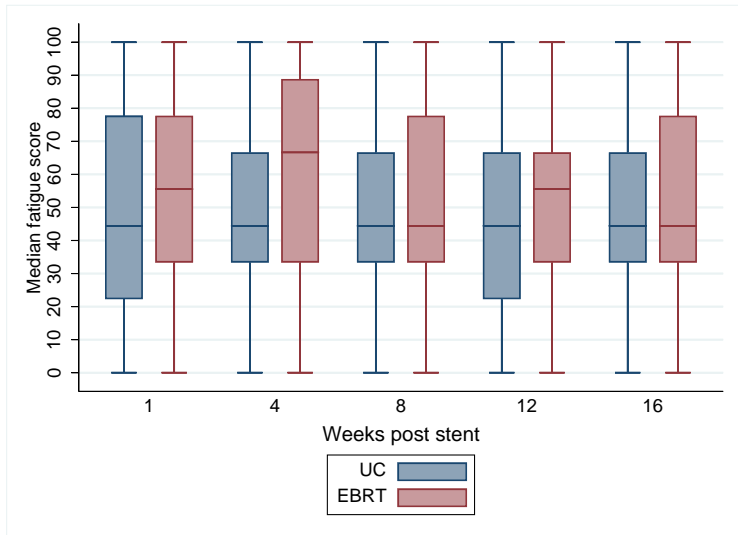

**Figure S8: Box plots of fatigue scores by time and treatment group**

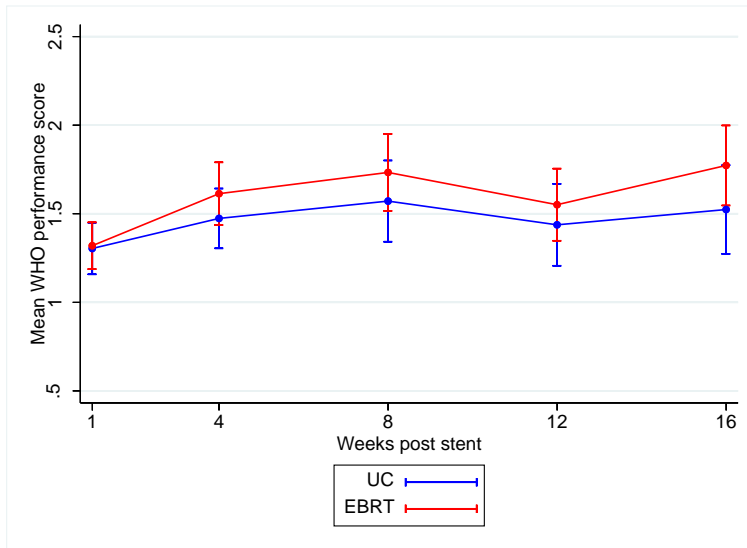

**Figure S9: Mean WHO performance status scores and 95% confidence intervals by time and treatment group**

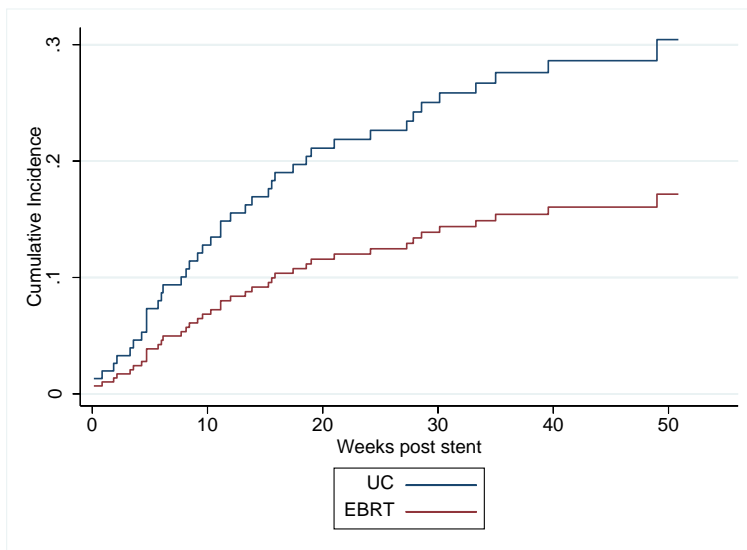

**Figure S10: Cumulative incidence plots of time to first upper GI related bleed event (up to week 52)**

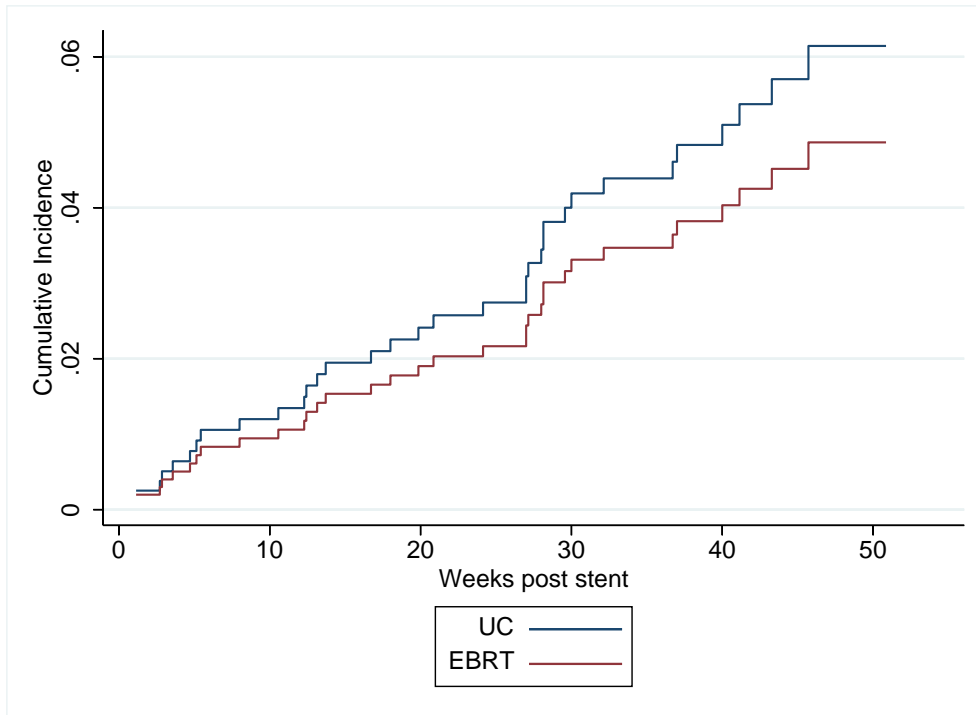

Adjusted SHR 0.79 (95% CI 0.37-1.66; two-sided p-value 0.529; n=199).  
 Median time to first dysphagia-related stent complication or re-intervention event (weeks):  
 Stent only arm 45.7 (95% CI 37.0-; n=102)  
 Stent plus radiotherapy arm 58.9 (95% CI 36.7-; n=97)

**Figure S11: Cumulative Incidence Function plot of first dysphagia-related stent complication or re-intervention by trial arm (up to week 52)**

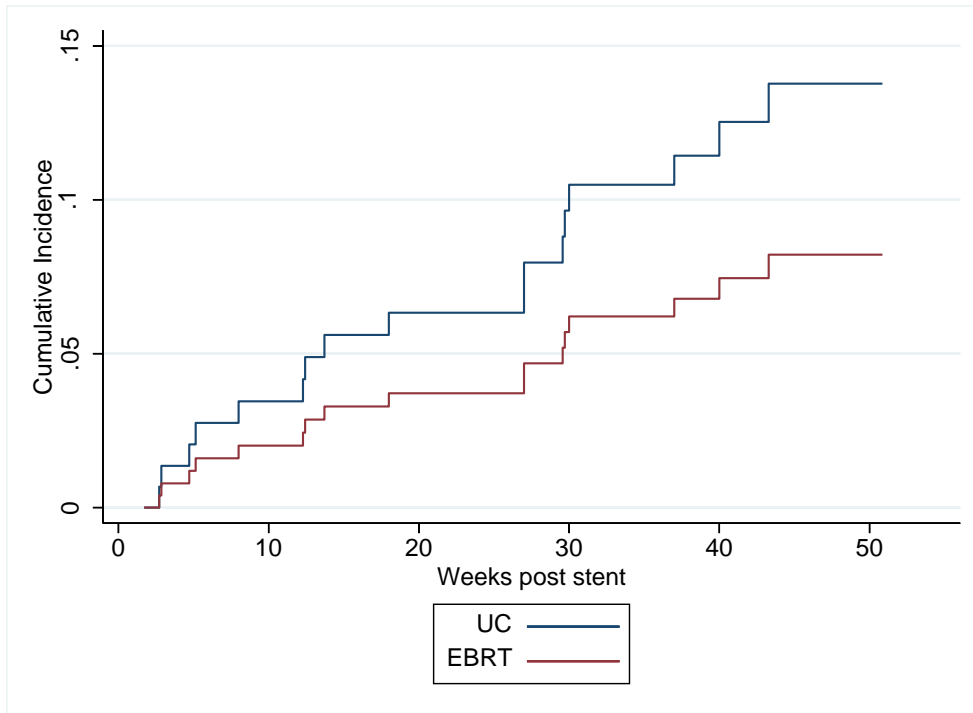

Adjusted SHR 0.58 (95% CI 0.23-1.46; two-sided p-value 0.246; n=199).

Median time to first additional stent insertion (weeks):

Stent only arm was not reached

Stent plus radiotherapy arm 59.7 (95% CI 43.3-not reached)

**Figure S12: Cumulative Incidence Function plot of first additional stent insertion by trial arm, with death as a competing risk (up to week 52)**

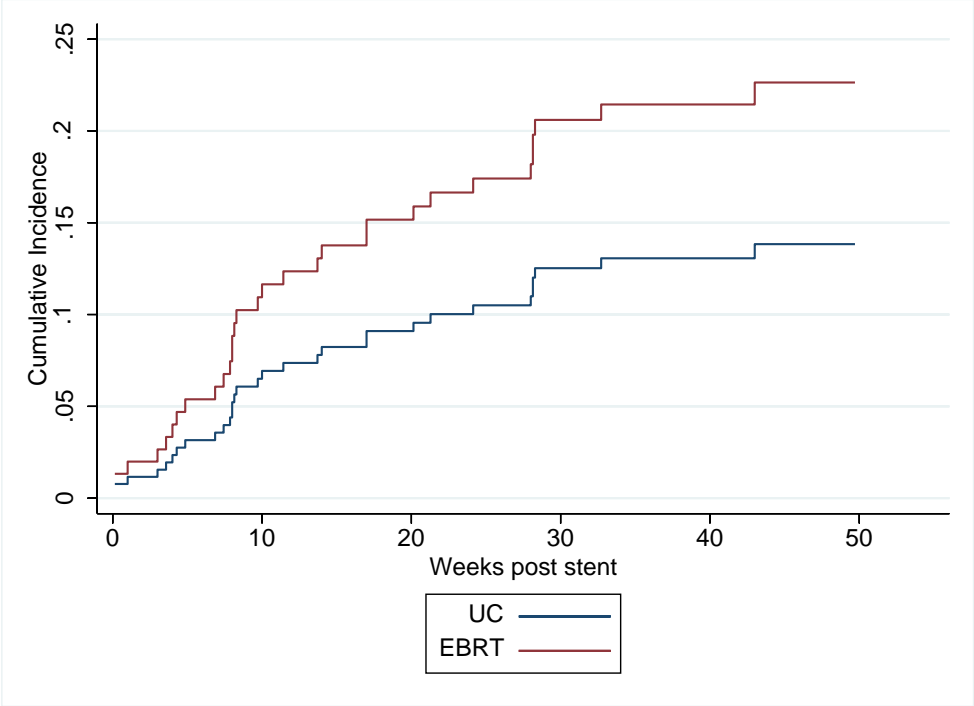

Adjusted SHR 1.72 (95%CI 0.86-3.47; two-sided p-value 0.126; n=199)  
 Median time to first endoscopy (weeks) was not reached in either arm.

**Figure S13: Cumulative Incidence Function plot of first repeat endoscopy by trial arm (up to week 52)**

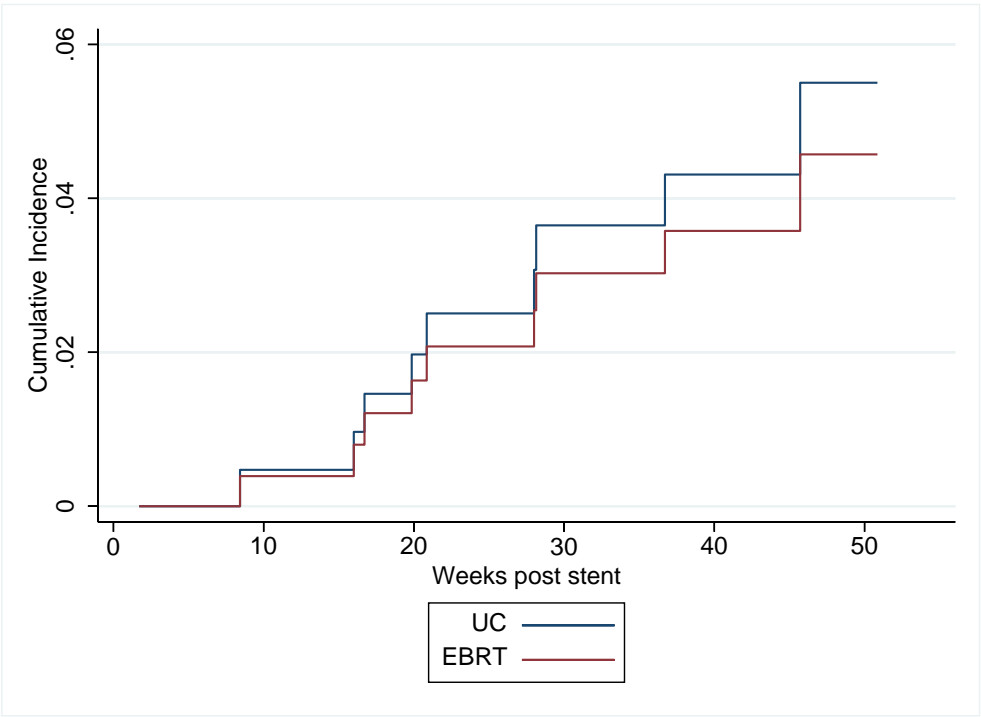

Adjusted SHR 0.83 (95%CI 0.21-3.24; two-sided p-value 0.785; n=199).  
 Median time to first overgrowth or undergrowth of stent (weeks) was not reached in either arm.

**Figure S14: Cumulative Incidence Function plot of first overgrowth or undergrowth of stent by trial arm, with death as a competing risk (up to week 52)**

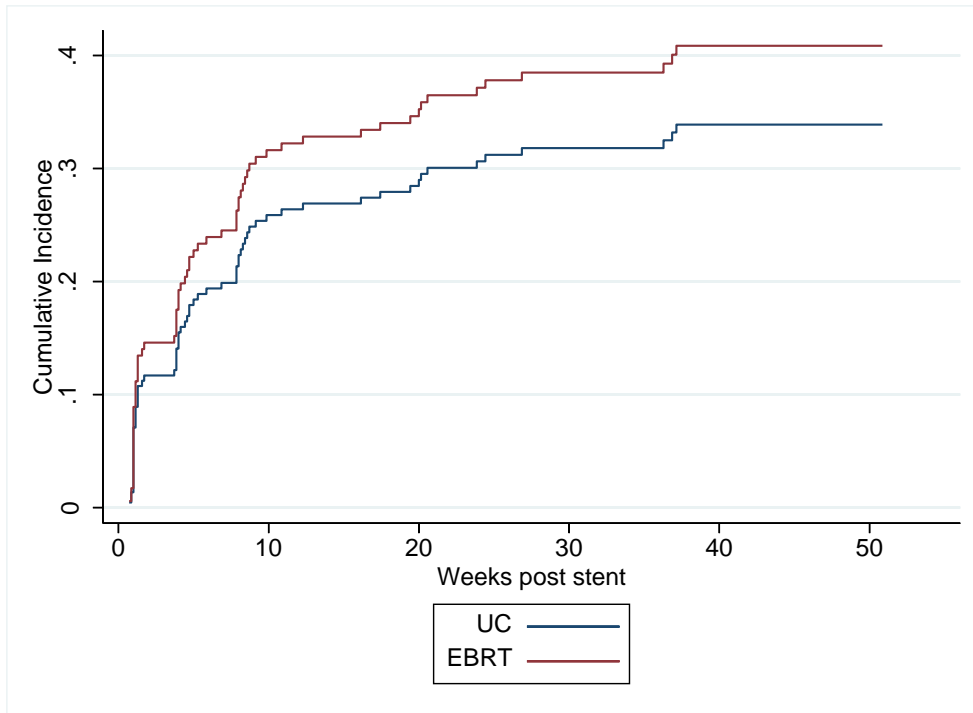

Adjusted SHR 1.27 (95%CI 0.80-2.03; two-sided p-value 0.318; n=199).  
 Median time to first stent-related pain event (weeks) was not reached vs 36.3 (95%CI 20.0-not reached) stent vs stent plus radiotherapy.

**Figure S15: Cumulative Incidence Function plot of first Grade 2+ stent-related pain event by trial arm, with death as a competing risk**



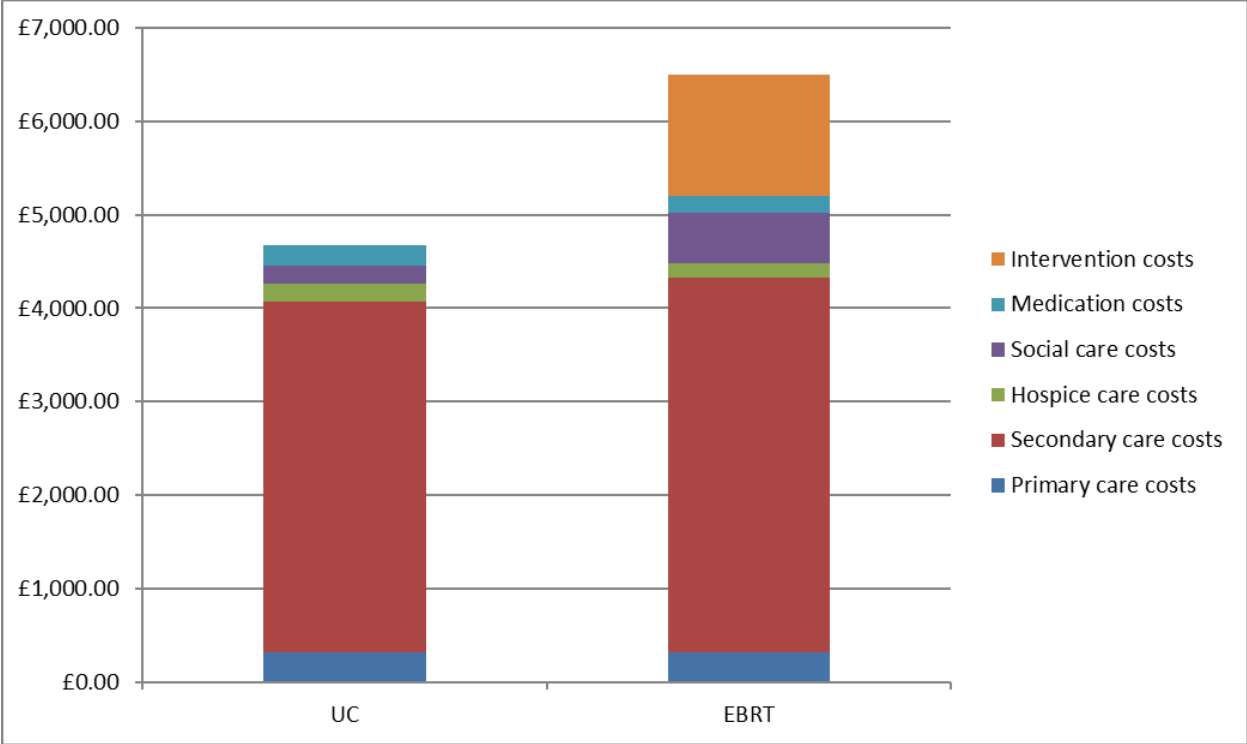

**Figure S16: Mean health care costs in the modified ITT population in the 12-week follow up period**

A)

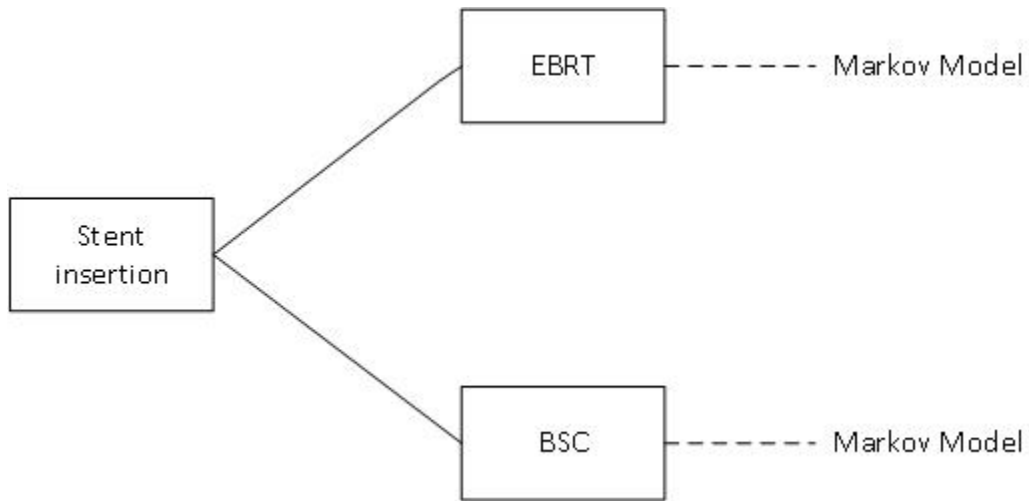

B)

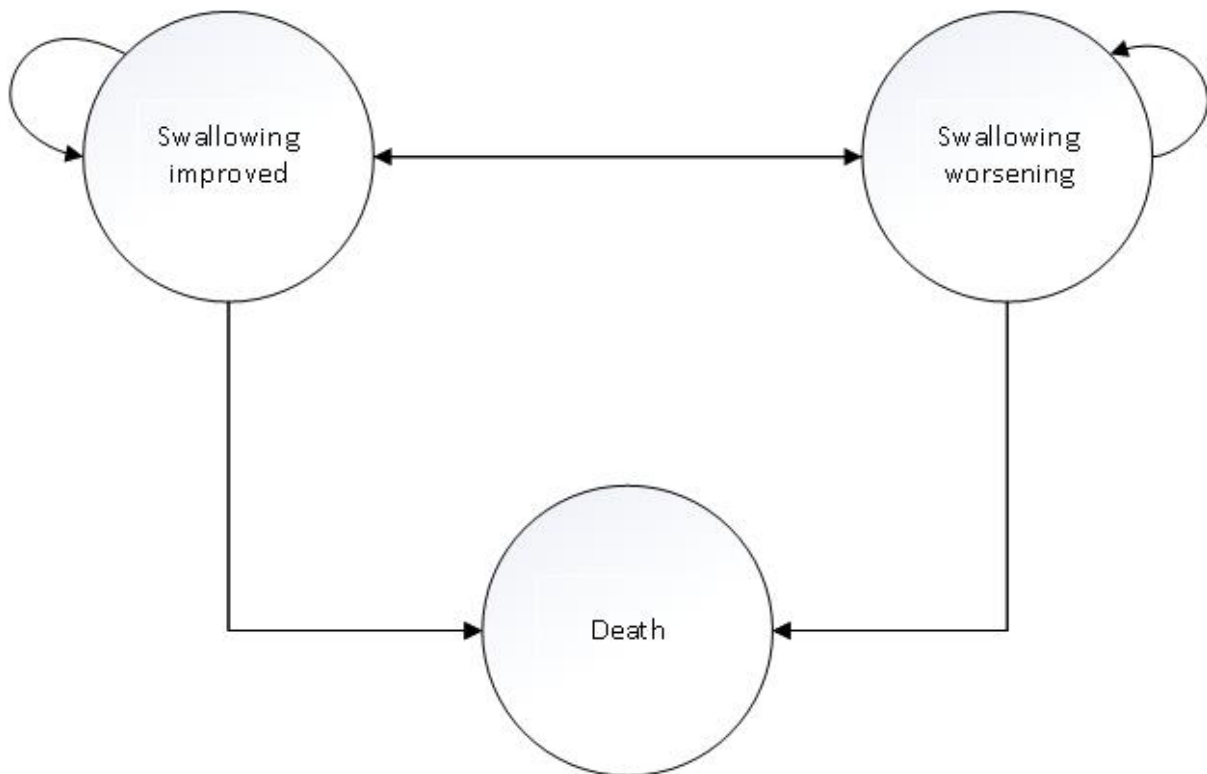

Figure S17: Schematic of the decision-analytic model constructed to calculate the cost-effectiveness of EBRT.

A) Decision tree for weeks 0 to 4; B) Markov model for weeks 5 to 12
